# Supplementary material for: Primary and repeat surgical treatment for female pelvic organ prolapse and incontinence in parous women in the UK: a register linkage study
Source: PubMed Central journal article supplement — BMJ Open. 2011 Nov 14;1(2):e000206. doi: 10.1136/bmjopen-2011-000206 (PMC3221293; doi:10.1136/bmjopen-2011-000206), 2011-11-14
Supplement: bmjopen-2011-000206.draft_revisions.pdf [file bmjopen-2011-000206.draft_revisions.pdf]

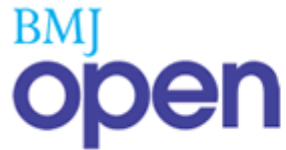

**EPIDEMIOLOGY OF PRIMARY AND REPEAT SURGICAL  
TREATMENT FOR FEMALE PELVIC ORGAN PROLAPSE AND  
INCONTINENCE**

|                                 |                                                                                                                                                                                                                                                                                                                                                                   |
|---------------------------------|-------------------------------------------------------------------------------------------------------------------------------------------------------------------------------------------------------------------------------------------------------------------------------------------------------------------------------------------------------------------|
| Journal:                        | <i>BMJ Open</i>                                                                                                                                                                                                                                                                                                                                                   |
| Manuscript ID:                  | bmjopen-2011-000206                                                                                                                                                                                                                                                                                                                                               |
| Article Type:                   | Research                                                                                                                                                                                                                                                                                                                                                          |
| Date Submitted by the Author:   | 08-Jun-2011                                                                                                                                                                                                                                                                                                                                                       |
| Complete List of Authors:       | Abdel-fattah, Mohamed; University of Aberdeen, Obstetrics and Gynaecology<br>Famulusi, Akinbowale; University of Aberdeen, Obstetrics and Gynaecology<br>Fielding, Shona; University of Aberdeen, Public Health<br>Ford, John; University of Aberdeen, Division of Population Health<br>Bhattacharya, Sohinee; University of Aberdeen, Obstetrics and Gynaecology |
| <b>Primary Subject Heading</b>: | Epidemiology                                                                                                                                                                                                                                                                                                                                                      |
| Keywords:                       | EPIDEMIOLOGY, PELVIC FLOOR DYSFUNCTION, SURGERY (UROGYNAECOLOGY), PELVIC ORGAN PROLAPSE, URINARY INCONTINENCE                                                                                                                                                                                                                                                     |
|                                 |                                                                                                                                                                                                                                                                                                                                                                   |

SCHOLARONE™  
Manuscripts

only

## EPIDEMIOLOGY OF PRIMARY AND REPEAT SURGICAL TREATMENT FOR FEMALE PELVIC ORGAN PROLAPSE AND INCONTINENCE

Mohamed Abdel-fattah<sup>1</sup>, Akinbowale Familusi<sup>2</sup>, Shona Fielding<sup>3</sup>, John Ford<sup>4</sup>, Sohinee Bhattacharya<sup>5</sup>

<sup>1</sup>Senior Clinical Lecturer, Urogynaecology, <sup>2</sup>Research Fellow Urogynaecology, <sup>3</sup>Lecturer, Medical Statistics, <sup>4</sup>Research Fellow Population Health, <sup>5</sup>Lecturer, Obstetric Epidemiology  
University of Aberdeen

**Corresponding Author: Dr. Mohamed Abdel-fattah**

Second Floor, Aberdeen Maternity Hospital, Foresterhill, Aberdeen, AB25 2ZD, UK

Tel: +44 (0) 1224-552635

Fax: +44 (0) 1224-559948

Email: [m.abdelfattah@abdn.ac.uk](mailto:m.abdelfattah@abdn.ac.uk)

**Running Title:** Surgery for pelvic organ prolapse and incontinence

**Conflict of Interest:** The authors declare that they have no conflict of interest

**Contributorship:** MAF conceived the research idea, wrote the first draft of the paper and was responsible for the clinical interpretation of the findings. AF facilitated data linkage, cleaned the linked data and conducted initial analyses. SF conducted and supervised all statistical analyses. JF conducted initial literature searches. SB gave methodological support in the designing of the study and extraction and linkage of data. All authors contributed to the writing of the final draft of the paper. MAF is the guarantor of this paper.

**Copyright:** The Corresponding Author has the right to grant on behalf of all authors and does grant on behalf of all authors, a worldwide licence to the Publishers and its licensees in perpetuity, in all forms, formats and media (whether known now or created in the future), to i) publish, reproduce, distribute, display and store the Contribution, ii) translate the Contribution into other languages, create adaptations, reprints, include within collections and create summaries, extracts and/or, abstracts of the Contribution, iii) create any other derivative work(s) based on the Contribution, iv) to exploit all subsidiary rights in the Contribution, v) the inclusion of electronic links from the Contribution to third party material wherever it may be located; and, vi) licence any third party to do any or all of the above.

**Ethics:** This research proposal was approved by the Steering Committee of the Aberdeen Maternity and Neonatal Databank and the Privacy Advisory Committee of the Information and Services Division NHS Scotland. Formal ethical approval was sought from the North of Scotland Research Ethics Service and was not considered necessary as only anonymised data were analysed in this study.

**Funding:** The research was funded by NHS Grampian Research grant.

**Role of sponsors:** The University of Aberdeen acted as sponsors for this research project, but the findings and their interpretation in this study are the authors' own.

**Independence of authors from funders:** All authors were employed by the University of Aberdeen at the time of conducting this research and are independent from the funders.

## Abstract

### Objectives:

- To determine the lifetime risk of undergoing various types of pelvic floor surgery in a cohort of UK women.
- To determine the re-operation rates for various pelvic floor surgery, time intervals for repeat surgery and the independent risk factors for undergoing primary and repeat pelvic floor surgery.

### Study design:

Retrospective register based cohort study.

### Main outcome measures:

Primary outcome:

- Lifetime risk of parous women in UK undergoing any form of pelvic floor surgery and various sub groups: pelvic organ prolapse (POP)/ urinary incontinence (UI)/rectal prolapse or faecal incontinence (RP-FI)

Secondary outcomes:

- Re-operation rates and time interval for repeat surgery for POP/UI.
- Independent risk factors for undergoing primary and repeat pelvic floor surgery.

### Results

34631 women identified from the AMND were linked with the Scottish Morbidity Records (SMR) databases of NHS Scotland to assess the relevant outcomes.

The lifetime risk for women by age of 80 years for undergoing any form of pelvic floor surgery was 12.2%. 2130 (6.2%) women had at least one pelvic floor surgery, of which 407 (19 %) had repeat operations. The median time interval between index and repeat UI and POP surgery were 2.80 (0.94 to 8.07) years and 3 (1.00 to 8.25) years respectively.

There is a reduced life-time risk of pelvic floor surgery in women who had all deliveries by caesarean section only ( $p < 0.001$ ) and those aged less than 20 years at first delivery ( $p = 0.021$ ) while there is an increased risk in women who sustained at least one perineal laceration (in the absence of a classified perineal tear) during delivery ( $p < 0.001$ ) and in women who had at least one instrumental delivery with the use of forceps ( $p = 0.015$ ).

### Conclusions:

Our study reveals that more than one in ten parous women in UK, over their lifetime, will require at least one surgical procedure for pelvic floor disorders. The study also identifies independent risk and protective factors for pelvic floor surgery in parous women.

### Article focus

- Lifetime risk of pelvic floor surgery in a cohort of UK women
- Re-operation rates, time interval for repeat surgery and risk factors for undergoing primary and repeat pelvic floor surgery.

### Key messages:

- More than one in ten parous women in the UK will require at least one surgical procedure for pelvic floor dysfunction
- Re-operation rate for pelvic floor dysfunction is 19%
- Increased BMI and forceps delivery are risk factors for pelvic floor surgery (both of which are avoidable) while exclusive delivery by caesarean section is protective.

### Strengths and limitations:

The main strengths include its large cohort size and long duration of follow-up; unless the study cohort is large there would be insufficient numbers of women having repeat surgery to be able to assess re-operation rates with adequate precision. Furthermore our study represents the general population rather than a selected population therefore we are confident that our findings are generalisable to the UK or indeed any European population.

1  
2  
3 Aberdeen city and district had a relatively stable population over the last century, minimising loss to follow up.  
4 Both AMND & SMR databases used in this study are subjected to quality control measures at regular intervals  
5 and there are numerous consistency checks in place to ensure validity of data entry. Good quality data relating to  
6 both exposure (AMND) and outcomes (SMR) added strength and validity to the findings.  
7

8 Our study however had a number of limitations: Information was missing on smoking and BMI in a large  
9 proportion of women. We were unable to link 27% of women with the SMR databases. There is also a  
10 possibility, albeit small, of misclassification bias resulting from wrong linkage due to error in probability  
11 matching.  
12  
13  
14  
15  
16  
17  
18  
19  
20  
21  
22  
23  
24  
25  
26  
27  
28  
29  
30  
31  
32  
33  
34  
35  
36  
37  
38  
39  
40  
41  
42  
43  
44  
45  
46  
47  
48  
49  
50  
51  
52  
53  
54  
55  
56  
57  
58  
59  
60

For peer review only

## Introduction:

Female pelvic floor disorders such as urinary incontinence (UI) and pelvic organ prolapse (POP) are common and distressing conditions for women particularly over the age of 40 years (1) and are associated with negative impact on a woman's social, physical and psychological wellbeing. The true prevalence of these disorders is difficult to determine; but it is estimated that in this age group, in UK, around 6 million (40%) have clinically significant UI symptoms, of whom 1 million (6.2%) are bothered by these symptoms and 2.2% find them socially disabling (2). UI has significant cost implications to the individual and the health services; in the UK it accounts for 0.3% of the NHS budget (3) in-addition to costs borne by women (4). Similarly, POP is an increasingly prevalent condition as the elderly female population continues to rise (5).

Conservative management is usually the first line of treatment, although surgical treatment for UI/POP is quite common; Aparna et al (6) reported that 18/10,000 women in USA had undergone surgical treatment for POP in 2003 with rates rising with advancing age. In the UK, POP accounts for 20% of women on the waiting list for major gynecological surgery and is the indication for 15% of hysterectomies (7) while 11,000 mid-urethral sling (MUS) procedures were performed for stress UI in England alone in 2009-10 (8). In 1997, Olsen et al (9) in a widely quoted study showed that the lifetime risk for women to undergo a surgical operation for UI/POP by the age of 80 years was 11.1%. However, a recent study in the West of Australia reported a significantly higher risk (19%) for POP surgery by the age of 85 years (10). Re-operation rates for UI/POP widely varied in the literature between 43-56% in tertiary referral centers (11, 12) to 17% in the general population (13).

1  
2  
3 In the UK, the population is expected to increase from an estimated 61.4 million in 2008 to  
4  
5 71.6 million in 2033; the numbers in the older age groups will increase the fastest with the  
6  
7 number of women over 75 years expected to almost double by 2033 (from 4.8 million to 8.7  
8  
9 million or 81%) (14). The life-time risk of surgically managed UI/POP has not been  
10  
11 previously studied in a UK population despite its importance in planning medical services  
12  
13 and the future allocation of health resources.  
14  
15

### 16 17 18 19 20 **Research Questions:**

21  
22 In this study we aimed to determine the lifetime risk of parous women undergoing primary or  
23  
24 repeat pelvic floor surgery i.e. surgical treatment for UI, POP and rectal prolapse/ faecal  
25  
26 incontinence (RP-FI) in a cohort of women representing the “general population” in UK  
27  
28 (primary outcome). We also aimed to determine re-operation rates for UI/POP, time intervals  
29  
30 for repeat surgery and to assess independent risk factors for undergoing primary and repeat  
31  
32 UI/POP surgery (secondary outcomes).  
33  
34  
35  
36  
37  
38

### 39 **Methods**

#### 40 41 - **Identification of the cohort:**

42  
43 The Aberdeen Maternity and Neonatal Databank ([www.abdn.ac.uk/amnd](http://www.abdn.ac.uk/amnd)) stores linked  
44  
45 information on all obstetric related events occurring in women living in Aberdeen city and  
46  
47 district since 1950 and currently contains data for 147,000 women; so it is possible to  
48  
49 construct a complete reproductive history for each woman on the database. This database is  
50  
51 therefore ideal for raising a cohort of UK parous women, up to the age of 80 years for linking  
52  
53 them to the hospital discharge data (SMR01) in Scotland.  
54  
55  
56  
57  
58  
59

60 The Information and Services Division (ISD) is responsible for collating the morbidity

1  
2  
3 returns from all NHS hospitals in Scotland. The SMR 01/02 contain information on all  
4  
5 outpatient/ in-patient hospital admissions and discharges with around one million new  
6  
7 records added each year. A record linkage system is in place in Scotland using probability  
8  
9 matching to link together general hospital discharge records, death registrations from the  
10  
11 General Register Office for Scotland (GRO-S) and cancer registrations for individual  
12  
13 patients. All these health related data sets are contemporaneously added to the system, which  
14  
15 establishes a hospital career summary for individual patients in Scotland from 1975 to date.  
16  
17 This linkage system therefore offers the ideal opportunity to assess the lifetime risk of POP  
18  
19 and UI surgery in the cohort of women raised from the AMND.  
20  
21  
22  
23  
24  
25  
26

27 Records of parous women who were born before 1<sup>st</sup> January 1968 identified on the AMND  
28  
29 were linked by ISD to the SMR01 and the GRO-S death records using probability matching  
30  
31 to generate an anonymised study database of “linked” women followed-up to 31 July 2010.  
32  
33 The database contained information on episodes of diagnosis and surgical treatment for  
34  
35 pelvic floor disorders and death records of women if available. The reproductive histories as  
36  
37 recorded in the AMND database were extracted for these women.  
38  
39  
40  
41  
42  
43

#### 44 - Data available

45  
46 A number of variables were considered as potential risk factors for undergoing pelvic floor  
47  
48 surgery and were grouped as follows: “age of woman at 1<sup>st</sup> delivery”: < 20years; 20-29 years;  
49  
50 ≥30 years, “parity”: 1; 2 - 4; > 4, “twin delivery” , “mode of delivery”: all spontaneous  
51  
52 vaginal deliveries (SVD) or breech; all caesarean section (CS): instrumental with at least one  
53  
54 forceps delivery; instrumental but no forceps; combination of SVD and CS, “time interval  
55  
56 between deliveries”: one delivery only; all intervals <2 years; all intervals ≥ 2years; mixture  
57  
58 and “type of perineal wound sustained at delivery”: intact perineum; all episiotomies; at least  
59  
60

1  
2  
3 one 3<sup>rd</sup> degree tear; lacerations but no actual tears. Reference groups were identified  
4 according with advice from specialist urogynaecologists. The age of 80 years was chosen  
5  
6 based on information from “Office for National Statistics” (2009) showing that life  
7  
8 expectancy of women in UK is 82 years and in Scotland is 80 years (14).  
9  
10  
11  
12  
13  
14

15 - **Statistical Analysis:**

16  
17 Cox Regression was used to calculate lifetime risk for pelvic floor surgery; time was  
18 calculated from birth to date of operation (or censored at date of death/date of data extraction  
19 as appropriate). Unadjusted Cox regression models were carried out for various risk factors  
20 mentioned above; the adjusted models were then implemented to identify independent risk  
21 factors for primary surgery for UI, POP or RP-FI. Sub-group analysis for women who had at  
22 least one operation was performed to calculate re-operation rates and logistic regression was  
23 used to determine any associations between the risk factors and repeat surgery. The logistic  
24 regression for repeat UI included type of primary operation as a potential risk factor.  
25  
26  
27  
28  
29  
30  
31  
32  
33  
34  
35  
36  
37  
38

39 **Results:**

40  
41 A total of 47103 women were identified in the AMND for initial linkage to the ISD database  
42 and 34754 (73%) of them were linked; 123 women were excluded leaving 34631 women in  
43 the cohort for analysis (Figure 1).  
44  
45  
46  
47  
48  
49  
50

51 - **Life time risk for pelvic floor surgery (UI, POP and/or FI/RP):**

52  
53 Within the cohort of women; 2130/34631 (6.2%) had surgical treatment for UI, POP and/or  
54 FI/RP; 762 women (2.2%) had an operation for UI; 1508 women (4.4%) had a POP repair  
55 and 98 women (0.3%) underwent an operation for RP-FI. The index surgery was for UI in  
56  
57 609 women (28.6%), POP in 1357 women (63.7%), combined UI and POP in 66 women  
58  
59  
60



Figure 1: Flow diagram of participants in study

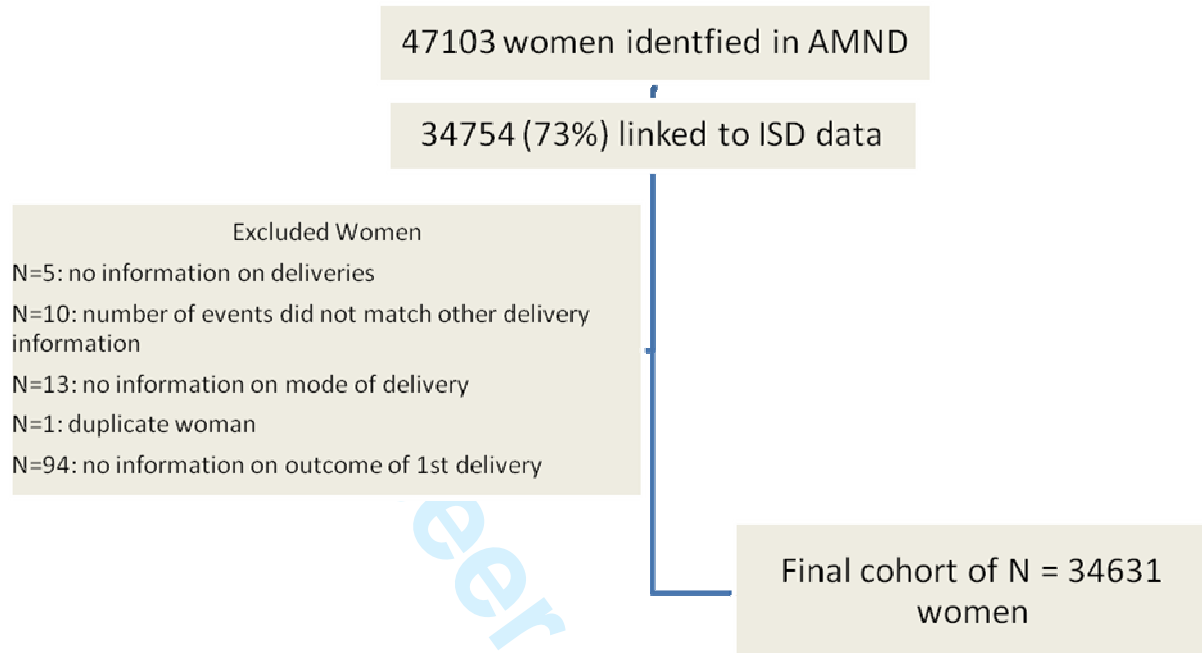

(3.1%) and RP-FI in 78 women (3.7%). **Figure 2** shows the cumulative hazard for women to undergo a pelvic floor surgery with age; the lifetime risk for women to undergo a pelvic floor surgery, by age 80, is **12.2%**. Further analysis showed the lifetime risk of undergoing UI operation is 3.6%, POP repair is 9.5% and RP-FI operation is 0.7%.

- **Risk factors for undergoing single pelvic floor surgery (UI, POP and/or RP-FI):**

**Table 1** shows the Cox regression model for each potential risk factor; a reduced risk of pelvic floor surgery was seen if a woman had caesarean deliveries only ( $p < 0.001$ ) while the risk increased for women who sustained perineal lacerations in absence of classified perineal tears ( $p < 0.001$ ). BMI was considered to be an important risk factor however data on BMI was available for only 20054 (58%) of the women. Undertaking the same analysis in this subgroup, and including BMI showed that women with increased BMI had an increased risk of pelvic floor surgery ( $p = 0.007$ ). With normal BMI as reference group, the adjusted HRs

Figure 2: Plot of cumulative risk of surgery for pelvic floor disorders (POP/ UI/ RP-FI)

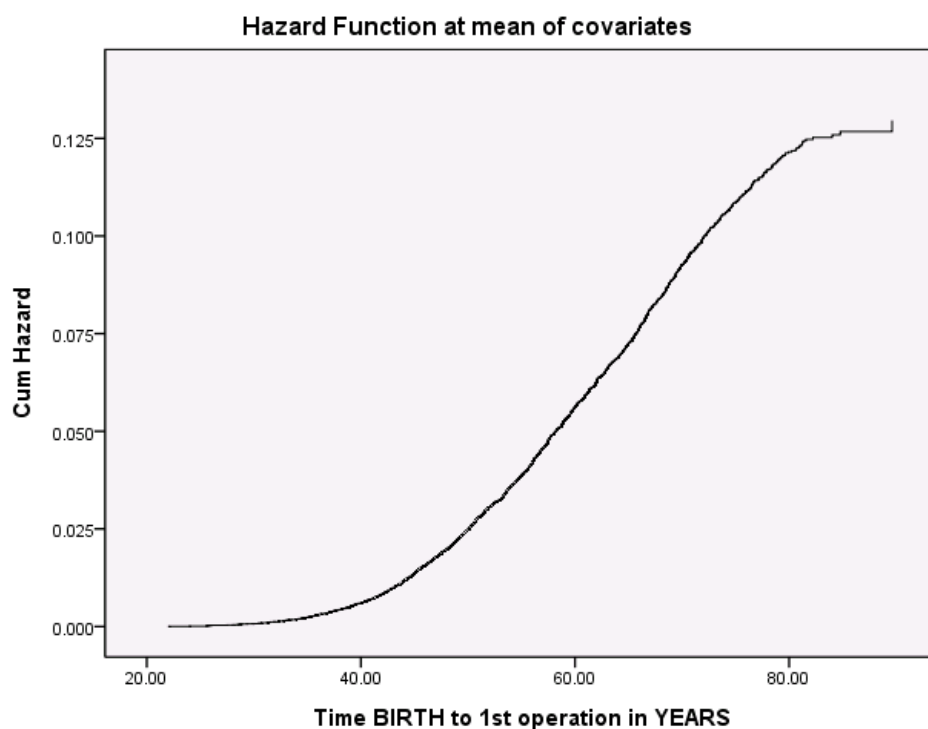

(95% CI) for BMI were: underweight (HR = 0.60; 95% CI 0.34, 1.06; p = 0.078), overweight (HR = 1.22; 95% CI 1.06, 1.41; p = 0.007), obese (HR = 0.94; 95% CI 0.72, 1.22; p = 0.63).

Subgroup analyses of independent risk factors for undergoing UI, POP or RP-FI surgery separately are shown in **Table 2, 3 & 4**. Having at least one forceps delivery was an independent risk factor for undergoing POP/ RP-FI but not a UI operation. Similarly sustaining a third degree perineal tear was only a risk factor for a RP-FI operation. Delivering all siblings by CS was significantly protective against surgery for UI/ POP but not FI-RP.

Table 1: Cox Regression Results for Risks of Undergoing Pelvic Floor Surgery (POP, UI and/ or FI/RP)

| Risk Factor                                 | All Women<br>(N=34631) | No Operation<br>(N=32501) | Operation<br>(N=2130) | Unadjusted |              |         | Adjusted |              |         |
|---------------------------------------------|------------------------|---------------------------|-----------------------|------------|--------------|---------|----------|--------------|---------|
|                                             | N (%)                  | N (%)                     | N (%)                 | HR         | 95% CI       | p-value | HR       | 95% CI       | p-value |
| <b>Mode of delivery</b>                     |                        |                           |                       |            |              |         |          |              |         |
| SVD/Breech only                             | 21210 (61.2%)          | 19776 (60.8%)             | 1434(67.3%)           | 1.00       |              |         |          |              |         |
| CS only                                     | 2551 (7.4%)            | 2524 (7.8%)               | 27 (1.3%)             | 0.25       | (0.16, 0.36) | <0.001  | 0.27     | (0.18, 0.39) | <0.001  |
| Instrumental (at least one forceps)         | 9022 (26.1%)           | 8433 (25.9%)              | 589 (27.7%)           | 1.14       | (1.03, 1.26) | 0.007   | 1.13     | (1.02, 1.25) | 0.015   |
| Instrumental (at least one, but no forceps) | 663 (1.9%)             | 639 (2.0%)                | 24 (1.1%)             | 1.42       | (0.95, 2.13) | 0.09    | 1.35     | (0.90, 2.02) | 0.15    |
| SVD+CS                                      | 1185 (3.4%)            | 1129 (3.5%)               | 56 (2.6%)             | 0.92       | (0.70, 1.20) | 0.53    | 0.89     | (0.68, 1.17) | 0.40    |
| <b>Age at 1st delivery</b>                  |                        |                           |                       |            |              |         |          |              |         |
| Under 20 years                              | 5867 (16.9%)           | 5510 (17.0%)              | 357 (16.8%)           | 0.88       | (0.78, 0.99) | 0.035   | 0.87     | (0.78, 0.98) | 0.021   |
| 20-29 years                                 | 23751 (68.6%)          | 22221 (68.4%)             | 1530 (71.8%)          | 1.00       |              |         | 1.00     |              |         |
| 30-49 years                                 | 5013 (14.5%)           | 4770 (14.7%)              | 243 (11.4%)           | 1.11       | (0.97, 1.28) | 0.12    | 1.34     | (1.16, 1.54) | <0.001  |
| <b>Total number of deliveries</b>           |                        |                           |                       |            |              |         |          |              |         |
| Single                                      | 8699 (25.1%)           | 8306 (25.6%)              | 393 (18.5%)           | 1.00       |              |         | 1.00     |              |         |
| 2 to 4                                      | 24986 (72.1%)          | 23323 (71.8%)             | 1663 (78.1%)          | 1.41       | (1.26, 1.58) | <0.001  | 1.30     | (1.16, 1.46) | <0.001  |
| 5+                                          | 946 (2.7%)             | 872 (2.7%)                | 74 (3.5%)             | 1.15       | (0.90, 1.48) | 0.27    | 1.10     | (0.85, 1.41) | 0.48    |
| <b>Twins at some point</b>                  |                        |                           |                       |            |              |         |          |              |         |
| No                                          | 34148 (98.6%)          | 32044 (98.6%)             | 2104 (98.8%)          | 1.00       |              |         |          |              |         |
| Yes                                         | 483 (1.4%)             | 457 (1.4%)                | 26 (1.2%)             | 0.80       | (0.54, 1.17) | 0.25    |          |              |         |
| <b>Time between deliveries</b>              |                        |                           |                       |            |              |         |          |              |         |
| One delivery                                | 8699 (25.1%)           | 8306 (25.6%)              | 393 (18.5%)           | 1.00       |              |         |          |              |         |
| All < 2 years                               | 4151 (12.0%)           | 3883 (11.9%)              | 268 (12.6%)           | 1.40       | (1.19, 1.63) | <0.001  |          |              |         |
| All greater than or equal to 2 years        | 16510 (47.7%)          | 15463 (47.6%)             | 1047 (49.2%)          | 1.40       | (1.24, 1.57) | <0.001  |          |              |         |
| Mixture                                     | 5271 (15.2%)           | 4849 (14.9%)              | 422 (19.8%)           | 1.41       | (1.23, 1.62) | <0.001  |          |              |         |
| <b>Type of perineal wound</b>               |                        |                           |                       |            |              |         |          |              |         |
| No wound                                    | 14365 (41.5%)          | 13601 (41.8%)             | 764 (35.9%)           | 1.00       |              |         | 1.00     |              |         |
| All Episiotomy                              | 9457 (27.3%)           | 8852 (27.2%)              | 605 (28.4%)           | 1.19       | (1.07, 1.33) | 0.001   | 1.05     | (0.94, 1.18) | 0.37    |
| At least one 3rd degree tear                | 162 (0.5%)             | 150 (0.5%)                | 12 (0.6%)             | 1.99       | (1.12, 3.53) | 0.018   | 1.68     | (0.95, 2.97) | 0.076   |
| No Perineal Tears (lacerations only)        | 10647 (30.7%)          | 9898 (30.5%)              | 749 (35.2%)           | 1.57       | (1.41, 1.73) | <0.001  | 1.36     | (1.22, 1.52) | <0.001  |

Table 2: Cox Regression Results for Risk Factors of Undergoing Surgical Treatment for UI

| Risk Factor                                 | No Operation<br>(N=32501) | SUI Operation<br>(N=762) | Unadjusted |              |         | Adjusted |              |         |
|---------------------------------------------|---------------------------|--------------------------|------------|--------------|---------|----------|--------------|---------|
|                                             | N (%)                     | N (%)                    | HR         | 95% CI       | p-value | HR       | 95% CI       | p-value |
| <b>Mode of delivery</b>                     |                           |                          |            |              |         |          |              |         |
| SVD/Breech only                             | 19776 (60.8%)             | 533 (69.9%)              | 1.00       |              |         | 1.00     |              |         |
| CS only                                     | 2524 (7.8%)               | 18 (2.4%)                | 0.40       | (0.25, 0.64) | <0.001  | 0.51     | (0.32, 0.83) | 0.007   |
| Instrumental (at least one forceps)         | 8433 (25.9%)              | 172 (22.6%)              | 0.86       | (0.72, 1.02) | 0.08    | 0.86     | (0.72, 1.03) | 0.10    |
| Instrumental (at least one, but no forceps) | 639 (2.0%)                | 12 (1.6%)                | 1.72       | (0.97, 3.05) | 0.06    | 1.65     | (0.93, 2.94) | 0.09    |
| SVD+CS                                      | 1129 (3.5%)               | 27 (3.5%)                | 1.12       | (0.76, 1.65) | 0.57    | 1.07     | (0.73, 1.58) | 0.72    |
| <b>Age at 1st delivery</b>                  |                           |                          |            |              |         |          |              |         |
| Under 20 years                              | 5510 (17.0%)              | 182 (23.9%)              | 1.28       | (1.08, 1.52) | 0.004   | 1.25     | (1.05, 1.48) | 0.011   |
| 20-29 years                                 | 22221 (68.4%)             | 519 (68.1%)              | 1.00       |              |         | 1.00     |              |         |
| 30-49 years                                 | 4770 (14.7%)              | 61 (8.0%)                | 0.82       | (0.63, 1.07) | 0.14    | 1.00     | (0.76, 1.31) | 0.98    |
| <b>Total number of deliveries</b>           |                           |                          |            |              |         |          |              |         |
| Single                                      | 8306 (25.6%)              | 126 (16.5%)              | 1.00       |              |         | 1.00     |              |         |
| 2 to 4                                      | 23323 (71.8%)             | 614 (80.6%)              | 1.63       | (1.35, 1.97) | <0.001  | 1.45     | (1.18, 1.77) | <0.001  |
| 5+                                          | 872 (2.7%)                | 22 (2.9%)                | 1.17       | (0.74, 1.84) | 0.51    | 0.98     | (0.62, 1.56) | 0.93    |
| <b>Twins at some point</b>                  |                           |                          |            |              |         |          |              |         |
| No                                          | 32044 (98.6%)             | 754 (99.0%)              | 1.00       |              |         |          |              |         |
| Yes                                         | 457 (1.4%)                | 8 (1.0%)                 | 0.70       | (0.35, 1.41) | 0.32    |          |              |         |
| <b>Time between deliveries</b>              |                           |                          |            |              |         |          |              |         |
| One delivery                                | 8306 (25.6%)              | 126 (16.5%)              | 1.00       |              |         |          |              |         |
| All < 2 years                               | 3883 (11.9%)              | 97 (12.7%)               | 1.57       | (1.20, 2.04) | 0.001   |          |              |         |
| All greater than or equal to 2 years        | 15463 (47.6%)             | 393 (51.6%)              | 1.63       | (1.33, 1.99) | <0.001  |          |              |         |
| Mixture                                     | 4849 (14.9%)              | 146 (19.2%)              | 1.59       | (1.25, 2.01) | <0.001  |          |              |         |
| <b>Type of perineal wound</b>               |                           |                          |            |              |         |          |              |         |
| No wound                                    | 13601 (41.8%)             | 265 (34.8%)              | 1.00       |              |         | 1.00     |              |         |
| All Episiotomy                              | 8852 (27.2%)              | 239 (31.4%)              | 1.32       | (1.11, 1.58) | 0.002   | 1.22     | (1.01, 1.46) | 0.035   |
| At least one 3rd degree tear                | 150 (0.5%)                | 2 (0.3%)                 | 0.90       | (0.22, 3.62) | 0.88    | 0.81     | (0.20, 3.24) | 0.76    |
| No Perineal Tears (lacerations only)        | 9898 (30.5%)              | 256 (33.6%)              | 1.53       | (1.29, 1.82) | <0.001  | 1.31     | (1.10, 1.57) | 0.003   |

Table 3: Cox Regression Results for Risk Factors of Undergoing Surgical Treatment for POP

| Risk Factor                                 | No Operation<br>(N=32501) | POP Operation<br>(N=1508) | Unadjusted |              |         | Adjusted |              |         |
|---------------------------------------------|---------------------------|---------------------------|------------|--------------|---------|----------|--------------|---------|
|                                             | N (%)                     | N (%)                     | HR         | 95% CI       | p-value | HR       | 95% CI       | p-value |
| <b>Mode of delivery</b>                     |                           |                           |            |              |         |          |              |         |
| SVD/Breech only                             | 19776 (60.8%)             | 1021 (67.7%)              | 1.00       |              |         | 1.00     |              |         |
| CS only                                     | 2524 (7.8%)               | 7 (0.5%)                  | 0.09       | (0.04, 0.19) | <0.001  | 0.10     | (0.05, 0.21) | <0.001  |
| Instrumental (at least one forceps)         | 8433 (25.9%)              | 430 (28.5%)               | 1.20       | (1.07, 1.34) | 0.002   | 1.19     | (1.05, 1.33) | 0.004   |
| Instrumental (at least one, but no forceps) | 639 (2.0%)                | 16 (1.1%)                 | 1.41       | (0.86, 2.32) | 0.17    | 1.34     | (0.82, 2.21) | 0.25    |
| SVD+CS                                      | 1129 (3.5%)               | 34 (2.3%)                 | 0.80       | (0.57, 1.13) | 0.20    | 0.79     | (0.56, 1.12) | 0.18    |
| <b>Age at 1st delivery</b>                  |                           |                           |            |              |         |          |              |         |
| Under 20 years                              | 5510 (17.0%)              | 221 (14.7%)               | 0.77       | (0.67, 0.89) | <0.001  | 0.76     | (0.66, 0.89) | <0.001  |
| 20-29 years                                 | 22221 (68.4%)             | 1100 (72.9%)              | 1.00       |              |         | 1.00     |              |         |
| 30-49 years                                 | 4770 (14.7%)              | 187 (12.4%)               | 1.20       | (1.02, 1.40) | 0.023   | 1.48     | (1.26, 1.73) | <0.001  |
| <b>Total number of deliveries</b>           |                           |                           |            |              |         |          |              |         |
| Single                                      | 8306 (25.6%)              | 285 (18.9%)               | 1.00       |              |         | 1.00     |              |         |
| 2 to 4                                      | 23323 (71.8%)             | 1171 (77.7%)              | 1.38       | (1.21, 1.57) | <0.001  | 1.25     | (1.09, 1.44) | 0.001   |
| 5+                                          | 872 (2.7%)                | 52 (3.4%)                 | 1.08       | (0.80, 1.45) | 0.61    | 1.04     | (0.77, 1.41) | 0.81    |
| <b>Twins at some point</b>                  |                           |                           |            |              |         |          |              |         |
| No                                          | 32044 (98.6%)             | 1489 (98.7%)              | 1.00       |              |         |          |              |         |
| Yes                                         | 457 (1.4%)                | 19 (1.3%)                 | 0.81       | (0.52, 1.28) | 0.37    |          |              |         |
| <b>Time between deliveries</b>              |                           |                           |            |              |         |          |              |         |
| One delivery                                | 8306 (25.6%)              | 285 (18.9%)               | 1.00       |              |         |          |              |         |
| All < 2 years                               | 3883 (11.9%)              | 196 (13.0%)               | 1.42       | (1.18, 1.70) | <0.001  |          |              |         |
| All greater than or equal to 2 years        | 15463 (47.6%)             | 727 (48.2%)               | 1.35       | (1.18, 1.55) | <0.001  |          |              |         |
| Mixture                                     | 4849 (14.9%)              | 300 (19.9%)               | 1.37       | (1.16, 1.61) | <0.001  |          |              |         |
| <b>Type of perineal wound</b>               |                           |                           |            |              |         |          |              |         |
| No wound                                    | 13601 (41.8%)             | 527 (34.9%)               | 1.00       |              |         | 1.00     |              |         |
| All Episiotomy                              | 8852 (27.2%)              | 412 (27.3%)               | 1.19       | (1.04, 1.35) | 0.009   | 1.03     | (0.90, 1.17) | 0.70    |
| At least one 3rd degree tear                | 150 (0.5%)                | 6 (0.4%)                  | 1.50       | (0.67, 3.34) | 0.33    | 1.23     | (0.55, 2.76) | 0.61    |
| No Perineal Tears (lacerations only)        | 9898 (30.5%)              | 563 (37.3%)               | 1.73       | (1.53, 1.94) | <0.001  | 1.50     | (1.32, 1.70) | <0.001  |

Table 4: Cox Regression Results for Risk Factors of Undergoing Surgical Treatment for FI/RP

| Risk Factor                                    | No Operation<br>(N=32501) | RAP or FI<br>Operation<br>(N=1508) | Unadjusted |              |         | Adjusted |              |         |
|------------------------------------------------|---------------------------|------------------------------------|------------|--------------|---------|----------|--------------|---------|
|                                                | N (%)                     | N (%)                              | HR         | 95% CI       | p-value | HR       | 95% CI       | p-value |
| <b>Mode of delivery</b>                        |                           |                                    |            |              |         |          |              |         |
| SVD/Breech only                                | 19776 (60.8%)             | 56 (57.1%)                         | 1.00       |              |         | 1.00     |              |         |
| CS only                                        | 2524 (7.8%)               | 2 (2.0%)                           | 0.45       | (0.11, 1.84) | 0.26    | 0.41     | (0.10, 1.71) | 0.22    |
| Instrumental (at least one<br>forceps)         | 8433 (25.9%)              | 37 (37.8%)                         | 1.90       | (1.25, 2.88) | 0.003   | 1.81     | (1.18, 2.77) | 0.007   |
| Instrumental (at least one,<br>but no forceps) | 639 (2.0%)                | 1 (1.0%)                           | 1.39       | (0.19, 10.1) | 0.75    | 1.35     | (0.18, 9.87) | 0.77    |
| SVD+CS                                         | 1129 (3.5%)               | 2 (2.0%)                           | 0.83       | (0.20, 3.40) | 0.79    | 0.83     | (0.20, 3.39) | 0.79    |
| <b>Age at 1st delivery</b>                     |                           |                                    |            |              |         |          |              |         |
| Under 20 years                                 | 5510 (17.0%)              | 14 (14.3%)                         | 0.77       | (0.43, 1.36) | 0.36    |          |              |         |
| 20-29 years                                    | 22221 (68.4%)             | 73 (74.5%)                         | 1.00       |              |         |          |              |         |
| 30-49 years                                    | 4770 (14.7%)              | 11 (11.2%)                         | 0.97       | (0.52, 1.83) | 0.93    |          |              |         |
| <b>Total number of deliveries</b>              |                           |                                    |            |              |         |          |              |         |
| Single                                         | 8306 (25.6%)              | 16 (16.3%)                         | 1.00       |              |         |          |              |         |
| 2 to 4                                         | 23323 (71.8%)             | 77 (78.6%)                         | 1.65       | (0.96, 2.83) | 0.067   |          |              |         |
| 5+                                             | 872 (2.7%)                | 5 (5.1%)                           | 1.86       | (0.68, 5.09) | 0.23    |          |              |         |
| <b>Twins at some point</b>                     |                           |                                    |            |              |         |          |              |         |
| No                                             | 32044 (98.6%)             | 96 (98.0%)                         | 1.00       |              |         |          |              |         |
| Yes                                            | 457 (1.4%)                | 2 (2.0%)                           | 1.32       | (0.33, 5.34) | 0.70    |          |              |         |
| <b>Time between deliveries</b>                 |                           |                                    |            |              |         |          |              |         |
| One delivery                                   | 8306 (25.6%)              | 16 (16.3%)                         | 1.00       |              |         |          |              |         |
| All < 2 years                                  | 3883 (11.9%)              | 8 (8.2%)                           | 1.05       | (0.45, 2.45) | 0.91    |          |              |         |
| All greater than or equal to<br>2 years        | 15463 (47.6%)             | 54 (55.1%)                         | 1.82       | (1.04, 3.19) | 0.035   |          |              |         |
| Mixture                                        | 4849 (14.9%)              | 20 (20.4%)                         | 1.66       | (0.86, 3.21) | 0.13    |          |              |         |
| <b>Type of perineal wound</b>                  |                           |                                    |            |              |         |          |              |         |
| No wound                                       | 13601 (41.8%)             | 43 (43.9%)                         | 1.00       |              |         | 1.00     |              |         |
| All Episiotomy                                 | 8852 (27.2%)              | 26 (26.5%)                         | 0.98       | (0.60, 1.60) | 0.94    | 0.80     | (0.48, 1.33) | 0.40    |
| At least one 3rd degree tear                   | 150 (0.5%)                | 7 (7.1%)                           | 21.8       | (9.72, 48.7) | <0.001  | 16.9     | (7.44, 38.3) | <0.001  |
| No Perineal Tears<br>(lacerations only)        | 9898 (30.5%)              | 22 (22.4%)                         | 0.83       | (0.49, 1.38) | 0.47    | 0.76     | (0.45, 1.29) | 0.31    |

1  
2  
3 - **Re-operation rate for UI and/or/POP:**  
4  
5

6 407 women had more than one operation for UI/POP giving a re-operation rate of 19%. 238  
7 women had at least one repeat POP operation with a re-operation rate of 15.8% and median  
8 (IQR) time interval of 3.0 years (1.00, 8.25) between the index and repeat surgery. 67 women  
9 had at least one repeat UI surgery giving a re-operation rate of 8.8%. The median (IQR) time  
10 between index and repeat UI surgery was 2.80 (0.94, 8.07) years. The median time interval  
11 for repeat UI surgery varied according to the type of index operation; 0.93 years (0.27, 2.49)  
12 for mid-urethral slings compared to 4.20 years (1.73, 8.38) for retropubic abdominal  
13 procedures.  
14  
15  
16  
17  
18  
19  
20  
21  
22  
23  
24

25  
26  
27 - **Risk factors for re-operation of UI/POP:**  
28

29 Re-operation rate for UI was 3.2% (11/342) within the MUS group, 10.7% (34/319) within  
30 the abdominal retropubic surgery group, 17.5% (14/80) within the anterior colporrhaphy group  
31 and 50% (n=5/10) within the peri-urethral injectables group. **Table 5** shows the independent  
32 risk factors of re-operation for UI; using abdominal retropubic group as the reference group,  
33 women undergoing MUS had a significantly lower risk of repeat UI surgery.  
34  
35  
36  
37  
38  
39  
40  
41  
42

43  
44 **Table 6** shows the unadjusted ORs for the different risk factors for repeat POP operation;  
45 only women with age at first delivery of 30-39 years were less likely to have a re-operation  
46 for POP. 72/814 women underwent repeat anterior repair at some point with a re-operation  
47 rate for the anterior compartment of 8.8%. Similarly, 57/775 women underwent a repeat  
48 posterior repair with a re-operation rate of 7.4% for the posterior compartment. The median  
49 (IQR) time interval for repeat surgery was 3 years (1, 9.25) and 4 years (1, 9) for those  
50 women whose initial POP operation was in the anterior and posterior compartments  
51 respectively.  
52  
53  
54  
55  
56  
57  
58  
59  
60

Table 5: Results of Logistic Regression for Risk of Re-Operation for UI

| Risk Factor                           | UI operation |            | Unadjusted Analysis |              |         | Adjusted Analysis |              |         |
|---------------------------------------|--------------|------------|---------------------|--------------|---------|-------------------|--------------|---------|
|                                       | One (N=695)  | > 1 (N=67) | OR                  | 95% CI       | p-value | OR                | 95% CI       | p-value |
| <b>Type of first SUI surgery</b>      |              |            |                     |              |         |                   |              |         |
| Abdominal retropubic procedures       | 285 (41.0%)  | 34 (50.7%) | 1.00                |              |         | 1.00              |              |         |
| Mid-urethral slings                   | 331 (47.6%)  | 11 (16.4%) | 0.28                | (0.14, 0.56) | <0.001  | 0.30              | (0.15, 0.60) | 0.001   |
| Anterior Colporrhaphy                 | 66 (9.5%)    | 14 (20.9%) | 1.78                | (0.90, 3.50) | 0.096   | 1.92              | (0.97, 3.82) | 0.063   |
| Peri-urethral Injectables             | 5 (0.7%)     | 5 (7.5%)   | 8.38                | (2.31, 30.4) | 0.001   | 9.05              | (2.42, 33.8) | 0.001   |
| Repair of Uro-genital Fistulae        | 8 (1.2%)     | 3 (4.5%)   | 3.14                | (0.80, 12.4) | 0.102   | 2.50              | (0.58, 10.8) | 0.22    |
| <b>Mode of delivery</b>               |              |            |                     |              |         |                   |              |         |
| SVD only                              | 488 (70.2%)  | 45 (67.2%) | 1.00                |              |         |                   |              |         |
| CS only                               | 16 (2.3%)    | 2 (3.0%)   | 1.36                | (0.30, 6.08) | 0.69    |                   |              |         |
| At least one forceps                  | 158 (22.7%)  | 14 (20.9%) | 0.96                | (0.51, 1.80) | 0.90    |                   |              |         |
| At least one instrumental: no forceps | 9 (1.3%)     | 3 (4.5%)   | 3.62                | (0.95, 13.8) | 0.06    |                   |              |         |
| SVD+CS                                | 24 (3.5%)    | 3 (4.5%)   | 1.36                | (0.39, 4.68) | 0.63    |                   |              |         |
| <b>Age at 1st delivery</b>            |              |            |                     |              |         |                   |              |         |
| Under 20 years                        | 166 (23.9%)  | 16 (23.9%) | 0.93                | (0.51, 1.67) | 0.80    |                   |              |         |
| 20-29 years                           | 470 (67.6%)  | 49 (73.1%) | 1.00                |              |         |                   |              |         |
| 30-49 years                           | 59 (8.5%)    | 2 (3.0%)   | 0.33                | (0.08, 1.37) | 0.13    |                   |              |         |
| <b>Total number of deliveries</b>     |              |            |                     |              |         |                   |              |         |
| One                                   | 116 (16.7%)  | 10 (14.9%) | 1.00                |              |         |                   |              |         |
| 2 to 4                                | 558 (80.3%)  | 56 (83.6%) | 1.16                | (0.58, 2.35) | 0.67    |                   |              |         |
| 5+                                    | 21 (3.0%)    | 1 (1.5%)   | 0.55                | (0.07, 4.55) | 0.58    |                   |              |         |
| <b>Occurrence of twins</b>            |              |            |                     |              |         |                   |              |         |
| No                                    | 687 (98.8%)  | 67 (100%)  |                     |              |         |                   |              |         |
| yes                                   | 8 (1.2%)     | 0 (0%)     |                     |              |         |                   |              |         |
| <b>Time between deliveries</b>        |              |            |                     |              |         |                   |              |         |
| One delivery                          | 116 (16.7%)  | 10 (14.9%) | 1.00                |              |         |                   |              |         |
| All < 2 years                         | 89 (12.8%)   | 8 (11.9%)  | 1.04                | (0.40, 2.75) | 0.93    |                   |              |         |
| All greater than 2 years              | 354 (19.6%)  | 10 (14.9%) | 1.28                | (0.62, 2.64) | 0.51    |                   |              |         |
| Mixture                               | 136 (19.6%)  | 10 (14.9%) | 0.85                | (0.34, 2.12) | 0.73    |                   |              |         |
| <b>Type of perineal wound</b>         |              |            |                     |              |         |                   |              |         |
| No Wound                              | 239 (34.4%)  | 26 (38.8%) | 1.00                |              |         | 1.00              |              |         |
| All Episiotomy                        | 211 (30.4%)  | 28 (41.8%) | 1.22                | (0.69, 2.15) | 0.49    | 1.22              | (0.68, 2.19) | 0.51    |
| At least one 3rd degree tear          | 1 (0.1%)     | 1 (1.5%)   | 9.19                | (0.56, 151)  | 0.12    | 4.83              | (0.25, 92.8) | 0.30    |
| No Perineal tears (lacerations only)  | 244 (35.1%)  | 12 (17.9%) | 0.45                | (0.22, 0.92) | 0.028   | 0.46              | (0.22, 0.95) | 0.037   |



**Table 6: Results of Logistic Regression for Risk of Re-Operation for POP Repair.**

| Risk Factor                           | POP operation |             | Unadjusted |              |         |
|---------------------------------------|---------------|-------------|------------|--------------|---------|
|                                       | One (N=1270)  | > 1 (N=238) | OR         | 95% CI       | p-value |
| <b>Mode of delivery</b>               |               |             |            |              |         |
| SVD only                              | 857 (67.5%)   | 164 (68.9%) | 1.00       |              |         |
| CS only                               | 7 (0.6%)      | 0 (0%)      |            |              |         |
| At least one forceps                  | 365 (28.7%)   | 65 (27.3%)  | 0.93       | (0.68, 1.27) | 0.65    |
| At least one instrumental: no forceps | 15 (1.2%)     | 1 (0.4%)    | 0.35       | (0.05, 2.66) | 0.31    |
| SVD+CS                                | 26 (2.0%)     | 8 (3.4%)    | 1.61       | (0.72, 3.61) | 0.25    |
| <b>Age at 1st delivery</b>            |               |             |            |              |         |
| Under 20 years                        | 174 (13.7%)   | 47 (19.7%)  | 1.44       | (1.00, 2.06) | 0.049   |
| 20-29 years                           | 926 (72.9%)   | 174 (73.1%) | 1.00       |              |         |
| 30-49 years                           | 170 (13.4%)   | 17 (7.1%)   | 0.53       | (0.31, 0.90) | 0.018   |
| <b>Total number of deliveries</b>     |               |             |            |              |         |
| One                                   | 246 (19.4%)   | 39 (16.4%)  | 1.00       |              |         |
| 2 to 4                                | 978 (77.0%)   | 193 (81.1%) | 1.25       | (0.86, 1.81) | 0.25    |
| 5+                                    | 46 (3.6%)     | 6 (2.5%)    | 0.82       | (0.33, 2.06) | 0.68    |
| <b>Occurrence of twins</b>            |               |             |            |              |         |
| No                                    | 1254 (98.7%)  | 235 (98.7%) | 1.00       |              |         |
| yes                                   | 16 (1.3%)     | 3 (1.3%)    | 1.00       | (0.29, 3.46) | 0.99    |
| <b>Time between deliveries</b>        |               |             |            |              |         |
| One delivery                          | 246 (19.4%)   | 39 (16.4%)  | 1.00       |              |         |
| All < 2 years                         | 167 (13.1%)   | 29 (12.2%)  | 1.10       | (0.65, 1.84) | 0.73    |
| All greater than 2 years              | 608 (47.9%)   | 119 (50.0%) | 1.24       | (0.84, 1.83) | 0.29    |
| Mixture                               | 249 (19.6%)   | 51 (21.4%)  | 1.29       | (0.82, 2.03) | 0.27    |
| <b>Type of perineal wound</b>         |               |             |            |              |         |
| No Wound                              | 442 (34.8%)   | 85 (35.7%)  | 1.00       |              |         |
| All Episiotomy                        | 361 (28.4%)   | 51 (21.4%)  | 0.74       | (0.51, 1.07) | 0.11    |
| At least one 3rd degree tear          | 5 (0.4%)      | 1 (0.4%)    | 1.04       | (0.12, 9.01) | 0.97    |
| No perineal tears (lacerations only)  | 462 (36.4%)   | 101 (42.4%) | 1.14       | (0.83, 1.56) | 0.43    |

## Discussion:

**Summary of findings:** In this large longitudinal epidemiological study we have established the lifetime risk for women, in a UK parous population, to undergo a single pelvic floor surgery (UI/POP/RP-FI) as 12.2% by age of 80 years. Olsen et al (9) reported an 11.1% lifetime risk for women to undergo a single operation for UI/POP by age of 80 years. Their results were echoed by Fialkow et al (15) in 2008; they showed a similar 11.8% life-time risk for UI/POP surgery in a similar cohort of American women. The latter two studies were limited by the fact that they involved special population of health maintenance organisations which would generally exclude the elderly, socially disabled, lower social class and sick members of the public limiting the application of their results to the female general population both in the USA and European countries. Furthermore, they were cross-sectional studies and therefore suffered from a limited follow-up period. Our study is a longitudinal retrospective study spanning the life-time of a group of women representing the “general-population” in UK. We chose 80-years as our age limit as it represents the average life-span of women in UK (14). The population in Aberdeen city and district is predominantly caucasian however with a number of ethnic minority communities including Asian and Eastern Europe and therefore is deemed to be quite representative for the general UK population.

Unlike previous studies, we calculated the lifetime risk for surgical treatment of various pelvic floor disorders separately; the life-time risk of women to undergo a single UI operation in our study was 3.6%. The MRC Leicestershire study (2) showed that 33.6% of the population in the UK above age of 40 years describe UI symptoms however only 6.2% reported these symptoms to be bothersome. A recent French study showed similar findings with 29% prevalence of female UI although only 9% sought some form of medical help (16). Conservative measures such as pelvic floor muscle training (PFMT) can be quite successful

1  
2  
3 in management of 50-60% of women with UI (17) while surgical treatment is usually a  
4  
5 second line management. The above facts would suggest that the life-time risk reported in  
6  
7 our study is likely to be a true reflection of the current clinical practice.  
8  
9

10  
11  
12 Our study showed that the lifetime risk of women to undergo a single POP surgery was 9.5%;  
13  
14 this was almost 50% lower than the risk of women in Western Australia! In 2010, Smith et al  
15  
16 (10) conducted a cross-sectional study on female “general population” in Western Australia  
17  
18 between 2001 and 2005 and they calculated a higher life-time risk for POP surgery of 19% by  
19  
20 age of 85 years. It is difficult to explain the huge difference in the results between both  
21  
22 population-based studies; the difference in design i.e. longitudinal vs. cross-sectional is  
23  
24 unlikely to be of such a major influence. In a European study, Hove et al (18) assessed the  
25  
26 whole population of a small town in Netherlands and reported that 40% of women aged 45-  
27  
28 85 years, have POP  $\geq$  stage II on examination however only 12% of women were  
29  
30 symptomatic. We therefore believe that, with the current concept of only treating  
31  
32 symptomatic and/or severe prolapse and knowing that a percentage of women will opt for  
33  
34 conservative measures such as vaginal pessaries, the life-time surgical risk reported in our  
35  
36 study is likely to be more representative for the clinical practice in UK and Europe.  
37  
38  
39  
40  
41  
42  
43  
44  
45

46 The re-operation rate for UI/POP in our study was 19% and was comparable with 17%  
47  
48 reported by Denman et al (13) in a 10 year follow-up prospective study. The re-operation rate  
49  
50 in the latter study increased to 21% after adjustment for missing women in the follow-up.  
51  
52 Olsen et al (9) reported 29% of cases to be re-operations for UI/ POP in their cross-sectional  
53  
54 study; it is important to note that 50% of their population were smokers (current/former) with  
55  
56 over 20% suffering of chronic lung disease which may have contributed to their relatively  
57  
58 higher re-operation rates. The re-operation rates, in our study, for UI and POP separately  
59  
60

1  
2  
3 were 8.8% and 15.8% respectively; these were comparable to 8% and 13% re-operation rates  
4 for UI and POP respectively reported by Clarke et al (19) in their 5-year prospective study.  
5  
6 Similarly, Fialkow et al (20) showed an 8.6% re-operation rate for UI over 8 years in a  
7  
8 retrospective cohort study. The POP re-operation rates in the same compartment were not  
9  
10 hugely different between the anterior and posterior compartments; similar results were  
11  
12 reported by Clarke et al (19) who showed 8 and 11% re-operation rates for anterior and  
13  
14 posterior compartments respectively within 5 years with higher re-operation rates (15% vs.  
15  
16 12% respectively) if associated with apical prolapse.  
17  
18  
19  
20  
21  
22  
23  
24

25 In our study, compared to women who had only SVDs, exclusive delivery by caesarean  
26  
27 sections was found to be protective against pelvic floor surgery for each of UI, POP, and RP-  
28  
29 FI ( $\approx 60\%$ ). This protective effect was not seen if a woman had a mixture of caesarian and  
30  
31 vaginal deliveries. A single forceps delivery significantly increased the risk of surgery for  
32  
33 POP and/or RP-FI but not for UI. Similar results were reported by MacArthur et al (21) in  
34  
35 their 12 years prospective study and Larson et al (22) in their nested case-control study. In our  
36  
37 study, the increased parity of 2-4 deliveries was an independent risk factor for POP/UI  
38  
39 surgery compared to a single delivery. A Dutch group previously showed increased parity of  
40  
41 2-3 to be a risk factor for the development of POP; interestingly the risk was not further  
42  
43 increased if parity was  $> 3$  (5). Conversely, MacArthur et al (21) found parity  $\geq 4$  to be a risk  
44  
45 factor for UI. The latter two studies assessed risk factors for development of symptomatic  
46  
47 UI/POP rather than risk factors for undergoing surgical treatment. It is evident from our data  
48  
49 that increased parity and vaginal forceps deliveries are risk factors for the development of  
50  
51 UI/POP that warrant surgical management. As expected, sustaining a third degree perineal  
52  
53 tear was a risk factor for undergoing RP-FI surgery and episiotomy was not found to be  
54  
55 protective.  
56  
57  
58  
59  
60

1  
2  
3  
4  
5  
6  
7  
8  
9  
10  
11  
12  
13  
14  
15  
16  
17  
18  
19  
20  
21  
22  
23  
24  
25  
26  
27  
28  
29  
30  
31  
32  
33  
34  
35  
36  
37  
38  
39  
40  
41  
42  
43  
44  
45  
46  
47  
48  
49  
50  
51  
52  
53  
54  
55  
56  
57  
58  
59  
60

Analysis of potential risk factors for re-operation for UI/POP did not reveal specific independent risk factors apart from delayed age at first delivery (30-39 years) which seems to be of little clinical significance if any. These results were in agreement with other studies in the literature (9, 13); all of which failed to detect independent risk factors for repeat UI/POP surgery. However it was evident that women undergoing MUS had significantly reduced risk of re-operation for UI when compared to abdominal retropubic surgery. Conversely, peri-urethral injections were associated with significantly higher risk of repeat UI surgery. Fialkow et al (20) have previously reported a reduced risk of repeat UI surgery following Burch colposuspension compared to traditional slings.

### **Strengths and limitations:**

To our knowledge, this is the first study to report the lifetime risk for women in UK to undergo surgical treatment for UI/ POP/ RP-FI. The main strengths include its large cohort size and long duration of follow-up; unless the study cohort is large there would be insufficient numbers of women having repeat surgery to be able to assess re-operation rates with adequate precision. Furthermore our study represents the general population rather than a selected population therefore we are confident that our findings are generalisable to the UK or indeed any European population. Aberdeen city and district had a relatively stable population over the last century, minimising loss to follow up. Both AMND & SMR databases used in this study are subjected to quality control measures at regular intervals and there are numerous consistency checks in place to ensure validity of data entry. Good quality data relating to both exposure (AMND) and outcomes (SMR) added strength and validity to the findings.

Our study however had a number of limitations: information was missing on smoking and BMI in a large proportion of women. We were unable to link 27% of women with the SMR

1  
2  
3 databases; there are a number of possible reasons for this: (a) failure to match the health  
4 records for these women with the data available on the AMND (b) these women are alive and  
5  
6 have moved away from Scotland (c) they may have undergone further treatment on private  
7  
8 basis. In the latter two situations their hospital admissions would not be recorded by the ISD  
9  
10 in Scotland. As migration is highly correlated with socio-economic status, we cannot rule out  
11  
12 any selection bias resulting from this. There is also a possibility, albeit small, of  
13  
14 misclassification bias resulting from wrong linkage due to error in probability matching.  
15  
16  
17  
18  
19  
20  
21

### 22 **Clinical and research Implications:**

23  
24 We believe our results are essential to inform policy makers in the UK and Europe with  
25  
26 regards healthcare planning for women and allocation of health resources and relevant staff  
27  
28 training. Increased BMI and forceps deliveries were independent risk factors for undergoing  
29  
30 surgery for pelvic floor disorders; both of which are potentially avoidable. Exclusive delivery  
31  
32 by Caesarean sections was found to be protective against pelvic floor surgery although not  
33  
34 100% protective; and other risks associated with delivery by caesarean sections should be  
35  
36 taken into consideration when making decisions regarding the mode of delivery.  
37  
38  
39  
40  
41  
42

### 43 **Conclusion**

44  
45 Our study reveals that more than one in ten parous women in UK, over their lifetime, will  
46  
47 require at least one surgical procedure for pelvic floor dysfunction with 19% requiring more  
48  
49 than one procedure. Independent risk factors for pelvic floor surgery were forceps delivery  
50  
51 and delayed initial child bearing. Protective factors included early initial delivery and  
52  
53 delivery exclusively by caesarean section. This information is essential for clinicians, patients  
54  
55 and policy makers with regards to counselling, decision making and allocation of health care  
56  
57 resources.  
58  
59  
60

**REFERENCES**

- (1) National Institute for Health and Clinical Excellence (NICE) and National Collaborating Centre for Women's and Children's Health. Urinary Incontinence; the management of urinary incontinence in women, Royal College of Obstetricians and Gynaecologists Press, London, 2006.
- (2) Perry S, Shaw C, Assassa P, Dallosso H, Williams K, Brittain KR, et al. An epidemiological study to establish the prevalence of urinary symptoms and felt need in the community: the Leicestershire MRC Incontinence Study. Leicestershire MRC Incontinence Study Team. *Journal of Public Health Medicine*. 2000; 22(3):427-434.
- (3) Turner DA, Shaw C, McGrother CW, Dallosso HM, Cooper NJ, MRC Incontinence Team. The cost of clinically significant urinary storage symptoms for community dwelling adults in the UK. *BJU international*. 2004; 93(9):1246-1252.
- (4) Papanicolaou S, Pons ME, Hampei C, Monz B, Quail D, Von der Schulenburg MG, et al. Medical resource utilisation and cost of care for women seeking treatment for urinary incontinence in an outpatient setting: Examples from three countries participating in the PURE study. *Maturitas* 2005; 30(2):35-47.
- (5) Hove M, Pool-Goudzwaard A, Eijkemans M, Steegers-Theunissen R, Burger C, Vierhout M. The prevalence of pelvic organ prolapse symptoms and signs and their relation with bladder and bowel disorders in a general female population. *Int Urogynecol J* 2009; 20:1037-1045
- (6) Aparna D, Kohli SN, Rajan SS, Hoyte L. The age distribution, rates, and types of surgery for pelvic organ prolapse in USA. *Int Urogynecol J* 2008; 19: 421-428
- (7) Carlson KJ, Nicholos DH, Schiff I. Indications for hysterectomy. *N Engl J Med* 1993; 328:856-860



- 1  
2  
3  
4 (8) Jacklin C, Duckett J. Analytic model comparing the cost utility of TVT versus  
5 duloxetine in women with urinary stress incontinence. *Int Urogynecol J*. 2010;  
6 21:977–984.  
7  
8  
9  
10 (9) Olsen AL, Smith VJ, Bergstrom JO, Colling JC, Clark AL. Epidemiology of  
11 surgically managed pelvic organ prolapse and urinary incontinence. *Obstet Gynecol*  
12 1997; 89: 501–6.  
13  
14  
15 (10) Smith F, Holman CD, Moorin RE, Tsokos N. Lifetime risk of undergoing surgery  
16 for pelvic organ prolapse. *Obstet Gynaec* 2010; 116 (5):1096-1100  
17  
18  
19 (11) Wiskind AK, Creighton SM, Stanton SL. The incidence of genital prolapse after the  
20 Burch colposuspension. *Am J Obstet Gynecol* 1992; 167: 399-405.  
21  
22  
23 (12) Kjolhede P, Noren B, Ryden G. Prediction of genital prolapse after Burch  
24 colposuspension. *Acta Obstet Gynecol Scand* 1996; 75: 849-54.  
25  
26  
27 (13) Denman MA, Gregory WT, Boyles SH, Smith V, Edwards SR, Clark AL.  
28 Reoperation 10 years after surgically managed pelvic organ prolapse and urinary  
29 incontinence. *Am J Obstet Gynecol* 2008; 198: 555.e1-555.e5.  
30  
31  
32 (14) Office of National Statistics 2009; [www.statistics.gov.uk](http://www.statistics.gov.uk)  
33  
34  
35 (15) Fialkow MF, Newton KM, Lentz GM, Weiss NS. Lifetime risk of surgical  
36 management for pelvic organ prolapse or urinary incontinence. *Int Urogynecol J*  
37 2008; 19: 437-440  
38  
39  
40 (16) Lasserre A, Pelat C, Gue´roult V, Hanslik T, Chartier-Kastler E, Blanchon T, Ciofu  
41 C, Montefiore ED, Alvarez F, Bloch J. Urinary Incontinence in French Women:  
42 Prevalence, Risk Factors and Impact on Quality of Life. *Eur Urol* 2009; 56: 177 –  
43 183  
44  
45  
46 (17) Imamura M, Abrams P, Bain C, Buckley B, Cardozo L, Cody J, Cook J, Eustice S,  
47  
48  
49  
50  
51  
52  
53  
54  
55  
56  
57  
58  
59  
60



1  
2  
3 N'Dow J, Pickard R, Ternent L, Wallace S, Wardle J, Zhu S L Vale L. Systematic  
4 review and economic modelling of the effectiveness and cost effectiveness of non-  
5 surgical treatments for women with stress urinary incontinence. *Health Technology*  
6 *Assessment* 2010; Vol. 14: No. 40  
7  
8  
9

10  
11  
12 (18) Hove M, Bloembergen H, Vierhout M, Schoenmaker G. Distribution of pelvic organ  
13 prolapse (POP) in the general population. *International Congress Series* 2005; 1279:  
14 383– 386  
15  
16  
17

18  
19  
20 (19) Clark AL, Gregory T, Smith VJ, Edwards R. Epidemiologic evaluation of  
21 reoperation for surgically treated pelvic organ prolapse and urinary incontinence. *Am*  
22 *J Obstet Gynecol* 2003; 189:1261- 1267  
23  
24  
25

26  
27 (20) Fialkow M, Gaston SR, Flum D. Reoperation for urinary incontinence. *Am J Obstet*  
28 *Gynecol* 2008; 199: 546.e1-546.e8  
29  
30

31  
32 (21) MacArthur C, Glazener C, Lancashire R, Herbison P, Wilson D, on behalf of the  
33 ProLong study group. Exclusive caesarean section delivery and subsequent urinary  
34 and faecal incontinence: a 12-year longitudinal study. *BJOG* 2011; DOI:  
35 10.1111/j.1471-0528.2011.02964  
36  
37  
38

39  
40  
41 (22) Larsson C, Källen K, and Andolf E. Cesarean section and risk of pelvic organ  
42 prolapse: a nested case-control study. *Am J Obstet Gynecol* 2009; 200: 243.e1-243.e  
43  
44  
45  
46  
47  
48  
49  
50  
51  
52  
53  
54  
55  
56  
57  
58  
59  
60

STROBE 2007 (v4) Statement—Checklist of items that should be included in reports of *cohort studies*

| Section/Topic                | Item # | Recommendation                                                                                                                                                                       | Reported on page # |
|------------------------------|--------|--------------------------------------------------------------------------------------------------------------------------------------------------------------------------------------|--------------------|
| Title and abstract           | 1      | (a) Indicate the study's design with a commonly used term in the title or the abstract                                                                                               | 2                  |
|                              |        | (b) Provide in the abstract an informative and balanced summary of what was done and what was found                                                                                  | 2                  |
| <b>Introduction</b>          |        |                                                                                                                                                                                      |                    |
| Background/rationale         | 2      | Explain the scientific background and rationale for the investigation being reported                                                                                                 | 3 and 4            |
| Objectives                   | 3      | State specific objectives, including any prespecified hypotheses                                                                                                                     | 4                  |
| <b>Methods</b>               |        |                                                                                                                                                                                      |                    |
| Study design                 | 4      | Present key elements of study design early in the paper                                                                                                                              | 2                  |
| Setting                      | 5      | Describe the setting, locations, and relevant dates, including periods of recruitment, exposure, follow-up, and data collection                                                      | 4 and 5            |
| Participants                 | 6      | (a) Give the eligibility criteria, and the sources and methods of selection of participants. Describe methods of follow-up                                                           | 5                  |
|                              |        | (b) For matched studies, give matching criteria and number of exposed and unexposed                                                                                                  |                    |
| Variables                    | 7      | Clearly define all outcomes, exposures, predictors, potential confounders, and effect modifiers. Give diagnostic criteria, if applicable                                             | 4                  |
| Data sources/<br>measurement | 8*     | For each variable of interest, give sources of data and details of methods of assessment (measurement). Describe comparability of assessment methods if there is more than one group | 5 and 6            |
| Bias                         | 9      | Describe any efforts to address potential sources of bias                                                                                                                            | 20                 |
| Study size                   | 10     | Explain how the study size was arrived at                                                                                                                                            | 5                  |
| Quantitative variables       | 11     | Explain how quantitative variables were handled in the analyses. If applicable, describe which groupings were chosen and why                                                         | 5 and 6            |
| Statistical methods          | 12     | (a) Describe all statistical methods, including those used to control for confounding                                                                                                | 6                  |
|                              |        | (b) Describe any methods used to examine subgroups and interactions                                                                                                                  | 6                  |
|                              |        | (c) Explain how missing data were addressed                                                                                                                                          | 19 and 20          |
|                              |        | (d) If applicable, explain how loss to follow-up was addressed                                                                                                                       | 20                 |
|                              |        | (e) Describe any sensitivity analyses                                                                                                                                                |                    |
| <b>Results</b>               |        |                                                                                                                                                                                      |                    |

|                          |     |                                                                                                                                                                                                              |           |
|--------------------------|-----|--------------------------------------------------------------------------------------------------------------------------------------------------------------------------------------------------------------|-----------|
| Participants             | 13* | (a) Report numbers of individuals at each stage of study—eg numbers potentially eligible, examined for eligibility, confirmed eligible, included in the study, completing follow-up, and analysed            | 6         |
|                          |     | (b) Give reasons for non-participation at each stage                                                                                                                                                         |           |
|                          |     | (c) Consider use of a flow diagram                                                                                                                                                                           | 7         |
| Descriptive data         | 14* | (a) Give characteristics of study participants (eg demographic, clinical, social) and information on exposures and potential confounders                                                                     |           |
|                          |     | (b) Indicate number of participants with missing data for each variable of interest                                                                                                                          | 7         |
|                          |     | (c) Summarise follow-up time (eg, average and total amount)                                                                                                                                                  | 5         |
| Outcome data             | 15* | Report numbers of outcome events or summary measures over time                                                                                                                                               |           |
| Main results             | 16  | (a) Give unadjusted estimates and, if applicable, confounder-adjusted estimates and their precision (eg, 95% confidence interval). Make clear which confounders were adjusted for and why they were included | 7-12      |
|                          |     | (b) Report category boundaries when continuous variables were categorized                                                                                                                                    | 5,7-12    |
|                          |     | (c) If relevant, consider translating estimates of relative risk into absolute risk for a meaningful time period                                                                                             |           |
| Other analyses           | 17  | Report other analyses done—eg analyses of subgroups and interactions, and sensitivity analyses                                                                                                               | 7-12      |
| <b>Discussion</b>        |     |                                                                                                                                                                                                              |           |
| Key results              | 18  | Summarise key results with reference to study objectives                                                                                                                                                     | 16-19     |
| <b>Limitations</b>       |     |                                                                                                                                                                                                              |           |
| Interpretation           | 20  | Give a cautious overall interpretation of results considering objectives, limitations, multiplicity of analyses, results from similar studies, and other relevant evidence                                   | 19 and 20 |
| Generalisability         | 21  | Discuss the generalisability (external validity) of the study results                                                                                                                                        | 19        |
| <b>Other information</b> |     |                                                                                                                                                                                                              |           |
| Funding                  | 22  | Give the source of funding and the role of the funders for the present study and, if applicable, for the original study on which the present article is based                                                | 1         |

\*Give information separately for cases and controls in case-control studies and, if applicable, for exposed and unexposed groups in cohort and cross-sectional studies.

**Note:** An Explanation and Elaboration article discusses each checklist item and gives methodological background and published examples of transparent reporting. The STROBE checklist is best used in conjunction with this article (freely available on the Web sites of PLoS Medicine at <http://www.plosmedicine.org/>, Annals of Internal Medicine at <http://www.annals.org/>, and Epidemiology at <http://www.epidem.com/>). Information on the STROBE Initiative is available at [www.strobe-statement.org](http://www.strobe-statement.org).

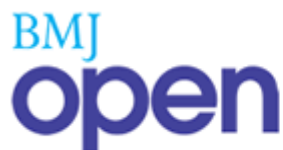

**PRIMARY AND REPEAT SURGICAL TREATMENT FOR FEMALE PELVIC ORGAN PROLAPSE AND INCONTINENCE IN PAROUS WOMEN IN UK: A REGISTER LINKAGE STUDY.**

|                                 |                                                                                                                                                                                                                                                                                                                                                                    |
|---------------------------------|--------------------------------------------------------------------------------------------------------------------------------------------------------------------------------------------------------------------------------------------------------------------------------------------------------------------------------------------------------------------|
| Journal:                        | <i>BMJ Open</i>                                                                                                                                                                                                                                                                                                                                                    |
| Manuscript ID:                  | bmjopen-2011-000206.R1                                                                                                                                                                                                                                                                                                                                             |
| Article Type:                   | Research                                                                                                                                                                                                                                                                                                                                                           |
| Date Submitted by the Author:   | 04-Aug-2011                                                                                                                                                                                                                                                                                                                                                        |
| Complete List of Authors:       | Abdel-fattah, Mohamed; University of Aberdeen, Obstetrics and Gynaecology<br>Familiusi, Akinbowale; University of Aberdeen, Obstetrics and Gynaecology<br>Fielding, Shona; University of Aberdeen, Public Health<br>Ford, John; University of Aberdeen, Division of Population Health<br>Bhattacharya, Sohinee; University of Aberdeen, Obstetrics and Gynaecology |
| <b>Primary Subject Heading</b>: | Epidemiology                                                                                                                                                                                                                                                                                                                                                       |
| Keywords:                       | EPIDEMIOLOGY, PELVIC FLOOR DYSFUNCTION, Urogynaecology < UROLOGY, PELVIC ORGAN PROLAPSE, URINARY INCONTINENCE                                                                                                                                                                                                                                                      |
|                                 |                                                                                                                                                                                                                                                                                                                                                                    |

SCHOLARONE™  
Manuscripts

only

1  
2  
3  
4 **PRIMARY AND REPEAT SURGICAL TREATMENT FOR FEMALE PELVIC**  
5 **ORGAN PROLAPSE AND INCONTINENCE IN PAROUS WOMEN IN UK: A**  
6 **REGISTER LINKAGE STUDY.**  
7  
8  
9

10 Mohamed Abdel-fattah<sup>1</sup>, Akinbowale Familusi<sup>2</sup>, Shona Fielding<sup>3</sup>, John Ford<sup>4</sup>, Sohinee Bhattacharya<sup>5</sup>

11  
12 <sup>1</sup>Senior Clinical Lecturer, Urogynaecology, <sup>2</sup>Research Fellow, Urogynaecology, <sup>3</sup>Lecturer, Medical  
13 Statistics, <sup>4</sup>Research Fellow Population Health, <sup>5</sup>Lecturer, Obstetric Epidemiology  
14 University of Aberdeen  
15

16 **Corresponding Author: Dr. Mohamed Abdel-fattah**

17 Second Floor, Aberdeen Maternity Hospital, Foresterhill, Aberdeen, AB25 2ZD, UK

18 **Tel:** +44 (0) 1224-552635

**Fax:** +44 (0) 1224-559948

19 **Email:** [m.abdelfattah@abdn.ac.uk](mailto:m.abdelfattah@abdn.ac.uk)  
20  
21

22 **Running Title:** Surgery for pelvic organ prolapse and incontinence  
23

24 **Competing Interest:** The authors declare that they have no conflict of interest.  
25

26 **Contributorship:** MAF conceived the research idea, wrote the first draft of the paper and was  
27 responsible for the clinical interpretation of the findings. AF facilitated data linkage, cleaned the linked  
28 data and conducted initial analyses. SF conducted and supervised all statistical analyses. JF conducted  
29 initial literature searches. SB gave methodological support in the designing of the study and extraction  
30 and linkage of data. All authors contributed to the writing of the final draft of the paper. MAF is the  
31 guarantor of this paper.  
32

33 **Copyright:** The Corresponding Author has the right to grant on behalf of all authors and does grant on  
34 behalf of all authors, a worldwide licence to the Publishers and its licensees in perpetuity, in all forms,  
35 formats and media (whether known now or created in the future), to i) publish, reproduce, distribute,  
36 display and store the Contribution, ii) translate the Contribution into other languages, create adaptations,  
37 reprints include within collections and create summaries, extracts and/or, abstracts of the Contribution,  
38 iii) Create any other derivative work(s) based on the Contribution, iv) to exploit all subsidiary rights in  
39 the Contribution, v) the inclusion of electronic links from the Contribution to third party material wherever  
40 it may be located; and, vi) licence any third party to do any or all of the above.  
41

42 **Ethics:** This research proposal was approved by the Steering Committee of the Aberdeen Maternity and  
43 Neonatal Databank and the Privacy Advisory Committee of the Information and Services Division NHS  
44 Scotland. Formal ethical approval was sought from the North of Scotland Research Ethics Service and  
45 was not considered necessary as only anonymised data were analysed in this study.  
46

47 **Funding:** This research was funded by NHS Grampian Endowment grant.  
48

49 **Role of sponsors:** The University of Aberdeen acted as sponsors for this research project, but the  
50 findings and their interpretation in this study are the authors' own.  
51

52 **Independence of authors from funders:** All authors were employed by the University of Aberdeen at  
53 the time of conducting this research and are independent from the funders.  
54

55 **Data Sharing:** Data tables and summaries are available from corresponding author at  
56 [m.abdelfattah@abdn.ac.uk](mailto:m.abdelfattah@abdn.ac.uk).  
57  
58  
59  
60

## Abstract

### **Objectives:**

- To determine the lifetime risk of undergoing various types of pelvic floor surgery in a cohort of UK women.
- To determine the re-operation rates for various pelvic floor surgery, time intervals for repeat surgery and the independent risk factors for undergoing primary and repeat pelvic floor surgery.

### **Study design:**

A register linkage study

### **Main outcome measures:**

Primary outcome:

- Lifetime risk of parous women in UK undergoing any form of pelvic floor surgery: pelvic organ prolapse (POP)/ urinary incontinence (UI) / rectal prolapse or faecal incontinence (RP-FI)

Secondary outcomes:

- Re-operation rates and time interval of repeat surgery for POP/UI.
- Independent risk factors for undergoing primary and repeat pelvic floor surgery.

### **Results**

34631 women identified from the AMND were linked with the Scottish Morbidity Records (SMR) databases of NHS Scotland to assess relevant outcomes.

The lifetime risk for women by age of 80 years, undergoing any form of pelvic floor surgery was 12.2%. 2130 (6.2%) women had at least one pelvic floor surgery, of which 407 (19 %) had repeat operations. The median time interval between index and repeat UI and POP surgery was 2.80 (0.94 to 8.07) years and 3 (1.00 to 8.25) years respectively.

There is a reduced life-time risk of pelvic floor surgery in women who had all deliveries by caesarean section only ( $p<0.001$ ) and those aged less than 20 years at first delivery ( $p=0.021$ ). Women who sustained at least one perineal laceration (in the absence of a classified perineal tear) during delivery or who had at least one instrumental delivery with the use of forceps were at increased risk ( $p<0.001$  and  $p=0.015$  respectively).

### **Conclusions:**

Our study shows that in the UK more than one in ten parous women will require at least one surgical procedure for pelvic floor disorders over their lifetime. The study also identifies independent risk and protective factors for pelvic floor surgery in parous women.

## Introduction:

Female pelvic floor disorders, such as urinary incontinence (UI) and pelvic organ prolapse (POP), are common and distressing conditions, particularly over the age of 40 years (1) and are associated with negative impact on a woman's social, physical and psychological wellbeing. The true prevalence of these disorders is difficult to determine. In this age group, in UK, approximately 6 million (40%) have clinically significant UI symptoms, of whom 1 million (6.2%) are bothered by these symptoms and 2.2% find them socially disabling (2). UI has significant cost implications to the individual and the health services; in the UK it accounts for 0.3% of the NHS budget (3) in-addition to costs borne by women (4). Similarly, POP is an increasingly prevalent condition especially as the elderly population continues to rise in UK (5).

Conservative management is usually the first line of treatment. However surgical treatment for UI/POP is common. Aparna et al (6) reported that 18/10,000 women in USA had undergone surgical treatment for POP in 2003, with rates rising with advancing age. In the UK, POP accounts for 20% of women on the waiting list for major gynecological surgery and is the indication for 15% of hysterectomies (7). In England alone, 11,000 mid-urethral sling (MUS) procedures were performed for stress UI in 2009-10 (8). Olsen et al (9) in a widely quoted study, in 1997, showed that the lifetime risk for American women to undergo a surgical operation for UI/POP by the age of 80 years was 11.1%. However, a recent study in the West of Australia reported a significantly higher risk (19%) of POP surgery by the age of 85 years (10). Re-operation rates for UI/POP vary widely in the literature from 43-56% in tertiary referral centers (11, 12) to 17% in the general population (13).

1  
2  
3 In the UK, the population is expected to increase from an estimated 61.4 million in 2008 to  
4  
5 71.6 million in 2033. Older age groups will increase fastest, with the number of women  
6  
7 over 75 years expected to almost double by 2033 (from 4.8 million to 8.7 million or 81%)  
8  
9  
10 (14). The lifetime risk of surgically managed UI/POP has not been previously studied in a UK  
11  
12 population despite its importance in medical services planning and health resources  
13  
14 allocation.  
15  
16

### 17 18 19 20 **Research Questions:**

21  
22 In this study we aimed to determine the lifetime risk of parous women undergoing primary or  
23  
24 repeat pelvic floor surgery, i.e. surgical treatment for UI, POP and rectal prolapse/ faecal  
25  
26 incontinence (RP-FI) in a cohort of women representing the “general population” in UK  
27  
28 (primary outcome). We also aimed to determine re-operation rates for UI/POP, time intervals  
29  
30 for repeat surgery and independent risk factors for undergoing primary and repeat UI/POP  
31  
32 surgery (secondary outcomes).  
33  
34  
35  
36  
37

### 38 39 **Methods**

#### 40 41 - **Identification of the cohort:**

42  
43 The Aberdeen Maternity and Neonatal Databank ([www.abdn.ac.uk/amnd](http://www.abdn.ac.uk/amnd)) stores linked  
44  
45 information on all obstetric related events occurring in women living in Aberdeen city and  
46  
47 district since 1950 and currently contains data for 147,000 women. Therefore it is possible to  
48  
49 construct a complete reproductive history for each woman on the database. This database is  
50  
51 therefore ideal for identifying a cohort of UK parous women, up to the age of 80 years, to  
52  
53 link to hospital discharge data (SMR01) in Scotland.  
54  
55  
56  
57  
58  
59  
60



1  
2  
3 The Information and Services Division (ISD) is responsible for collating the morbidity  
4 returns from all NHS hospitals in Scotland. The SMR 01/02 contain information on all  
5 outpatient/ in-patient hospital admissions and discharges with around one million new  
6 records added each year. A record linkage system is in place in Scotland using probability  
7 matching to link together general hospital discharge records, death registrations from the  
8 General Register Office for Scotland (GRO-S) and cancer registrations for individual  
9 patients. All these health related data sets are contemporaneously added to the system, which  
10 establishes a hospital career summary for individual patients in Scotland from 1975 to date.  
11 This linkage system therefore offers an ideal opportunity to assess the lifetime risk of POP  
12 and UI surgery in the cohort of women raised from the AMND.  
13  
14  
15  
16  
17  
18  
19  
20  
21  
22  
23  
24  
25  
26  
27  
28

29 To generate an anonymised study database of “linked” women up to 31 July 2010, records of  
30 parous women who were born before 1<sup>st</sup> January 1968 identified on the AMND were linked  
31 by ISD to the SMR01 and the GRO-S death records using probability matching. The database  
32 contained information on episodes of diagnosis and surgical treatment for pelvic floor  
33 disorders and death records of women if available. The reproductive histories as recorded in  
34 the AMND database were extracted for these women.  
35  
36  
37  
38  
39  
40  
41  
42  
43  
44  
45

#### 46 - Data available

47  
48 A number of variables were considered as potential risk factors for undergoing pelvic floor  
49 surgery and were grouped as follows: “*age of woman at 1<sup>st</sup> delivery*”: < 20years, 20-29 years  
50 or ≥30 years, “*parity*”: 1, 2 – 4, or > 4, “*twin delivery*”, “*mode of delivery*”: all spontaneous  
51 vaginal deliveries (SVD) or breech, all caesarean section (CS), instrumental with at least one  
52 forceps, instrumental but no forceps or combination of SVD and CS, “*time interval between*  
53 *deliveries*”: one delivery only, all intervals <2 years, all intervals ≥ 2years or mixture, and  
54  
55  
56  
57  
58  
59  
60

1  
2  
3  
4 “type of perineal wound sustained at delivery”: intact perineum, all episiotomies, at least one  
5  
6 3<sup>rd</sup> degree tear or lacerations but no actual tears. Reference groups were identified according  
7  
8 to advice from specialist urogynaecologist. The age of 80 years was chosen based on  
9  
10 information from “Office for National Statistics” (2009) showing that life expectancy of  
11  
12 women in UK is 82 years and in Scotland is 80 years (14).  
13  
14  
15  
16

17  
18 - **Statistical Analysis:**

19  
20 Cox Regression was used to calculate lifetime risk for pelvic floor surgery. Time was  
21  
22 calculated from birth to date of operation (or censored at date of death/date of data extraction  
23  
24 as appropriate). The proportional hazards assumption for each covariate in each model was  
25  
26 assessed using the log survival time versus the negative log of the survivor distribution  
27  
28 function. Each covariate showed parallel curves indicating the proportional hazards  
29  
30 assumption was met. Unadjusted Cox regression models were carried out for various risk  
31  
32 factors mentioned above. The adjusted models were then implemented to identify  
33  
34 independent risk factors for primary surgery for UI, POP or RP-FI. Time for these models  
35  
36 was calculated from date of first delivery to date of operation (or censored appropriately).  
37  
38  
39  
40  
41 Sub-group analysis for women who had at least one operation was performed to calculate re-  
42  
43 operation rates and logistic regression was used to determine any associations between the  
44  
45 risk factors and repeat surgery. Logistic regression for repeat UI included type of primary  
46  
47 operation as a potential risk factor.  
48  
49  
50  
51  
52

53  
54 **Results:**

55  
56 A total of 47103 women were identified in the AMND for initial linkage to the ISD database  
57  
58 and 34754 (73%) of them were linked; 123 women were excluded leaving 34631 women in  
59  
60 the cohort for analysis (**Figure 1**).

1  
2  
3  
4  
5  
6  
7  
8  
9  
10  
11  
12  
13  
14  
15  
16  
17  
18  
19  
20  
21  
22  
23  
24  
25  
26  
27  
28  
29  
30  
31  
32  
33  
34  
35  
36  
37  
38  
39  
40  
41  
42  
43  
44  
45  
46  
47  
48  
49  
50  
51  
52  
53  
54  
55  
56  
57  
58  
59  
60

- **Lifetime risk for pelvic floor surgery (UI, POP and/or FI/RP):**

Within the cohort of women; 2130/34631 (6.2%) had surgical treatment for UI, POP and/or FI/RP, 762 women (2.2%) had an operation for UI, 1508 women (4.4%) had a POP repair and 98 women (0.3%) underwent an operation for RP-FI. The index surgery was for UI in 609 women (28.6%), POP in 1357 women (63.7%), combined UI and POP in 66 women (3.1%) and RP-FI in 78 women (3.7%). **Figure 2** shows the cumulative hazard function for women to undergo a pelvic floor surgery with age. Using this model the lifetime distribution function can be calculated. The probability of a woman undergoing pelvic floor surgery by age 80 was 0.115. Further analysis showed that the probability of undergoing UI surgery was 0.036, POP repair was 0.091 and RP-FI operation was 0.007.

In other words, the lifetime risk for women to undergo a pelvic floor surgery, by age 80, is **12.2%**, while the lifetime risk of undergoing UI operation is 3.6%, POP repair is 9.5% and RP-FI operation is 0.7%.

- **Risk factors for undergoing single pelvic floor surgery (UI, POP and/or RP-FI):**

**Table 1** shows the Cox regression model for each potential risk factor. There was a reduced risk of pelvic floor surgery if a woman had caesarean deliveries only ( $p < 0.001$ ), while the risk increased for women who sustained perineal lacerations in absence of classified perineal tears ( $p < 0.001$ ). BMI was considered to be an important risk factor, however was only available for 20054 (58%) of the women. Undertaking the same analysis in this subgroup, and including BMI showed that women with increased BMI had an increased risk of pelvic floor surgery ( $p = 0.007$ ). With normal BMI as reference group, the adjusted HRs (95% CI) for BMI were: underweight (HR = 0.60; 95% CI 0.34, 1.06;  $p = 0.078$ ), overweight (HR = 1.22; 95% CI 1.06, 1.41;  $p = 0.007$ ) and obese (HR = 0.94; 95% CI 0.72, 1.22;  $p = 0.63$ ).

**Table 1: Cox Regression Results for Risks of Undergoing Pelvic Floor Surgery (POP, UI and/ or FI/RP)**

| Risk Factor                                 | All Women<br>(N=34631) | No Operation<br>(N=32501) | Operation<br>(N=2130) | Unadjusted |              |         | Adjusted |              |         |
|---------------------------------------------|------------------------|---------------------------|-----------------------|------------|--------------|---------|----------|--------------|---------|
|                                             | N (%)                  | N (%)                     | N (%)                 | HR         | 95% CI       | p-value | HR       | 95% CI       | p-value |
| <b>Mode of delivery</b>                     |                        |                           |                       |            |              |         |          |              |         |
| SVD/Breech only                             | 21210 (61.2%)          | 19776 (60.8%)             | 1434(67.3%)           | 1.00       |              |         |          |              |         |
| CS only                                     | 2551 (7.4%)            | 2524 (7.8%)               | 27 (1.3%)             | 0.25       | (0.16, 0.36) | <0.001  | 0.27     | (0.18, 0.39) | <0.001  |
| Instrumental (at least one forceps)         | 9022 (26.1%)           | 8433 (25.9%)              | 589 (27.7%)           | 1.14       | (1.03, 1.26) | 0.007   | 1.13     | (1.02, 1.25) | 0.015   |
| Instrumental (at least one, but no forceps) | 663 (1.9%)             | 639 (2.0%)                | 24 (1.1%)             | 1.42       | (0.95, 2.13) | 0.09    | 1.35     | (0.90, 2.02) | 0.15    |
| SVD+CS                                      | 1185 (3.4%)            | 1129 (3.5%)               | 56 (2.6%)             | 0.92       | (0.70, 1.20) | 0.53    | 0.89     | (0.68, 1.17) | 0.40    |
| <b>Age at 1st delivery</b>                  |                        |                           |                       |            |              |         |          |              |         |
| Under 20 years                              | 5867 (16.9%)           | 5510 (17.0%)              | 357 (16.8%)           | 0.88       | (0.78, 0.99) | 0.035   | 0.87     | (0.78, 0.98) | 0.021   |
| 20-29 years                                 | 23751 (68.6%)          | 22221 (68.4%)             | 1530 (71.8%)          | 1.00       |              |         | 1.00     |              |         |
| 30-49 years                                 | 5013 (14.5%)           | 4770 (14.7%)              | 243 (11.4%)           | 1.11       | (0.97, 1.28) | 0.12    | 1.34     | (1.16, 1.54) | <0.001  |
| <b>Total number of deliveries</b>           |                        |                           |                       |            |              |         |          |              |         |
| Single                                      | 8699 (25.1%)           | 8306 (25.6%)              | 393 (18.5%)           | 1.00       |              |         | 1.00     |              |         |
| 2 to 4                                      | 24986 (72.1%)          | 23323 (71.8%)             | 1663 (78.1%)          | 1.41       | (1.26, 1.58) | <0.001  | 1.30     | (1.16, 1.46) | <0.001  |
| 5+                                          | 946 (2.7%)             | 872 (2.7%)                | 74 (3.5%)             | 1.15       | (0.90, 1.48) | 0.27    | 1.10     | (0.85, 1.41) | 0.48    |
| <b>Twins at some point</b>                  |                        |                           |                       |            |              |         |          |              |         |
| No                                          | 34148 (98.6%)          | 32044 (98.6%)             | 2104 (98.8%)          | 1.00       |              |         |          |              |         |
| Yes                                         | 483 (1.4%)             | 457 (1.4%)                | 26 (1.2%)             | 0.80       | (0.54, 1.17) | 0.25    |          |              |         |
| <b>Time between deliveries</b>              |                        |                           |                       |            |              |         |          |              |         |
| One delivery                                | 8699 (25.1%)           | 8306 (25.6%)              | 393 (18.5%)           | 1.00       |              |         |          |              |         |
| All < 2 years                               | 4151 (12.0%)           | 3883 (11.9%)              | 268 (12.6%)           | 1.40       | (1.19, 1.63) | <0.001  |          |              |         |
| All greater than or equal to 2 years        | 16510 (47.7%)          | 15463 (47.6%)             | 1047 (49.2%)          | 1.40       | (1.24, 1.57) | <0.001  |          |              |         |
| Mixture                                     | 5271 (15.2%)           | 4849 (14.9%)              | 422 (19.8%)           | 1.41       | (1.23, 1.62) | <0.001  |          |              |         |
| <b>Type of perineal wound</b>               |                        |                           |                       |            |              |         |          |              |         |
| No wound                                    | 14365 (41.5%)          | 13601 (41.8%)             | 764 (35.9%)           | 1.00       |              |         | 1.00     |              |         |
| All Episiotomy                              | 9457 (27.3%)           | 8852 (27.2%)              | 605 (28.4%)           | 1.19       | (1.07, 1.33) | 0.001   | 1.05     | (0.94, 1.18) | 0.37    |
| At least one 3rd degree tear                | 162 (0.5%)             | 150 (0.5%)                | 12 (0.6%)             | 1.99       | (1.12, 3.53) | 0.018   | 1.68     | (0.95, 2.97) | 0.076   |
| No Perineal Tears (lacerations only)        | 10647 (30.7%)          | 9898 (30.5%)              | 749 (35.2%)           | 1.57       | (1.41, 1.73) | <0.001  | 1.36     | (1.22, 1.52) | <0.001  |

1  
2  
3 Subgroup analyses of independent risk factors for undergoing UI, POP or RP-FI surgery  
4 separately are shown in **Table 2, 3 & 4**. Undergoing at least one forceps delivery was an  
5 independent risk factor for requiring POP/ RP-FI surgery but not for a UI surgery. Similarly,  
6 sustaining a third degree perineal tear was only a risk factor for a RP-FI operation. Delivering  
7 all siblings by CS was significantly protective against surgery for UI/ POP but not RP-FI.  
8  
9

10  
11  
12  
13  
14  
15 - **Re-operation rate for UI and/or POP:**  
16

17  
18 407 women had more than one operation for UI/POP giving a re-operation rate of 19%. 238  
19 women had at least one repeat POP operation with a re-operation rate of 15.8% and median  
20 (IQR) 3.0 years (1.00, 8.25) between the index and repeat surgery. 67 women had at least one  
21 repeat UI surgery giving a re-operation rate of 8.8%. The median (IQR) time between index  
22 and repeat UI surgery was 2.80 (0.94, 8.07) years. The median time interval for repeat UI  
23 surgery varied according to the type of index operation; 0.93 years (0.27, 2.49) for mid-  
24 urethral slings compared to 4.20 years (1.73, 8.38) for retropubic abdominal procedures.  
25  
26  
27  
28  
29  
30  
31  
32  
33  
34  
35  
36

37 - **Risk factors for re-operation of UI/POP:**  
38

39  
40 Re-operation rate for UI was 3.2% (11/342) within the MUS group, 10.7% (34/319) within  
41 the abdominal retropubic surgery group, 17.5% (14/80) within the anterior colporrhaphy group  
42 and 50% (n=5/10) within the peri-urethral injectables group. **Table 5** shows the independent  
43 risk factors of re-operation for UI. Using abdominal retropubic group as the reference group,  
44 women undergoing MUS had a significantly lower risk of repeat UI surgery.  
45  
46  
47  
48  
49  
50  
51  
52  
53  
54  
55  
56  
57  
58  
59  
60

Table 2: Cox Regression Results for Risk Factors of Undergoing Surgical Treatment for UI

| Risk Factor                                 | No Operation<br>(N=32501) | SUI Operation<br>(N=762) | Unadjusted |              |         | Adjusted |              |         |
|---------------------------------------------|---------------------------|--------------------------|------------|--------------|---------|----------|--------------|---------|
|                                             | N (%)                     | N (%)                    | HR         | 95% CI       | p-value | HR       | 95% CI       | p-value |
| <b>Mode of delivery</b>                     |                           |                          |            |              |         |          |              |         |
| SVD/Breech only                             | 19776 (60.8%)             | 533 (69.9%)              | 1.00       |              |         | 1.00     |              |         |
| CS only                                     | 2524 (7.8%)               | 18 (2.4%)                | 0.40       | (0.25, 0.64) | <0.001  | 0.51     | (0.32, 0.83) | 0.007   |
| Instrumental (at least one forceps)         | 8433 (25.9%)              | 172 (22.6%)              | 0.86       | (0.72, 1.02) | 0.08    | 0.86     | (0.72, 1.03) | 0.10    |
| Instrumental (at least one, but no forceps) | 639 (2.0%)                | 12 (1.6%)                | 1.72       | (0.97, 3.05) | 0.06    | 1.65     | (0.93, 2.94) | 0.09    |
| SVD+CS                                      | 1129 (3.5%)               | 27 (3.5%)                | 1.12       | (0.76, 1.65) | 0.57    | 1.07     | (0.73, 1.58) | 0.72    |
| <b>Age at 1st delivery</b>                  |                           |                          |            |              |         |          |              |         |
| Under 20 years                              | 5510 (17.0%)              | 182 (23.9%)              | 1.28       | (1.08, 1.52) | 0.004   | 1.25     | (1.05, 1.48) | 0.011   |
| 20-29 years                                 | 22221 (68.4%)             | 519 (68.1%)              | 1.00       |              |         | 1.00     |              |         |
| 30-49 years                                 | 4770 (14.7%)              | 61 (8.0%)                | 0.82       | (0.63, 1.07) | 0.14    | 1.00     | (0.76, 1.31) | 0.98    |
| <b>Total number of deliveries</b>           |                           |                          |            |              |         |          |              |         |
| Single                                      | 8306 (25.6%)              | 126 (16.5%)              | 1.00       |              |         | 1.00     |              |         |
| 2 to 4                                      | 23323 (71.8%)             | 614 (80.6%)              | 1.63       | (1.35, 1.97) | <0.001  | 1.45     | (1.18, 1.77) | <0.001  |
| 5+                                          | 872 (2.7%)                | 22 (2.9%)                | 1.17       | (0.74, 1.84) | 0.51    | 0.98     | (0.62, 1.56) | 0.93    |
| <b>Twins at some point</b>                  |                           |                          |            |              |         |          |              |         |
| No                                          | 32044 (98.6%)             | 754 (99.0%)              | 1.00       |              |         |          |              |         |
| Yes                                         | 457 (1.4%)                | 8 (1.0%)                 | 0.70       | (0.35, 1.41) | 0.32    |          |              |         |
| <b>Time between deliveries</b>              |                           |                          |            |              |         |          |              |         |
| One delivery                                | 8306 (25.6%)              | 126 (16.5%)              | 1.00       |              |         |          |              |         |
| All < 2 years                               | 3883 (11.9%)              | 97 (12.7%)               | 1.57       | (1.20, 2.04) | 0.001   |          |              |         |
| All greater than or equal to 2 years        | 15463 (47.6%)             | 393 (51.6%)              | 1.63       | (1.33, 1.99) | <0.001  |          |              |         |
| Mixture                                     | 4849 (14.9%)              | 146 (19.2%)              | 1.59       | (1.25, 2.01) | <0.001  |          |              |         |
| <b>Type of perineal wound</b>               |                           |                          |            |              |         |          |              |         |
| No wound                                    | 13601 (41.8%)             | 265 (34.8%)              | 1.00       |              |         | 1.00     |              |         |
| All Episiotomy                              | 8852 (27.2%)              | 239 (31.4%)              | 1.32       | (1.11, 1.58) | 0.002   | 1.22     | (1.01, 1.46) | 0.035   |
| At least one 3rd degree tear                | 150 (0.5%)                | 2 (0.3%)                 | 0.90       | (0.22, 3.62) | 0.88    | 0.81     | (0.20, 3.24) | 0.76    |
| No Perineal Tears (lacerations only)        | 9898 (30.5%)              | 256 (33.6%)              | 1.53       | (1.29, 1.82) | <0.001  | 1.31     | (1.10, 1.57) | 0.003   |

Table 3: Cox Regression Results for Risk Factors of Undergoing Surgical Treatment for POP

| Risk Factor                                 | No Operation<br>(N=32501) | POP Operation<br>(N=1508) | Unadjusted |              |         | Adjusted |              |         |
|---------------------------------------------|---------------------------|---------------------------|------------|--------------|---------|----------|--------------|---------|
|                                             | N (%)                     | N (%)                     | HR         | 95% CI       | p-value | HR       | 95% CI       | p-value |
| <b>Mode of delivery</b>                     |                           |                           |            |              |         |          |              |         |
| SVD/Breech only                             | 19776 (60.8%)             | 1021 (67.7%)              | 1.00       |              |         | 1.00     |              |         |
| CS only                                     | 2524 (7.8%)               | 7 (0.5%)                  | 0.09       | (0.04, 0.19) | <0.001  | 0.10     | (0.05, 0.21) | <0.001  |
| Instrumental (at least one forceps)         | 8433 (25.9%)              | 430 (28.5%)               | 1.20       | (1.07, 1.34) | 0.002   | 1.19     | (1.05, 1.33) | 0.004   |
| Instrumental (at least one, but no forceps) | 639 (2.0%)                | 16 (1.1%)                 | 1.41       | (0.86, 2.32) | 0.17    | 1.34     | (0.82, 2.21) | 0.25    |
| SVD+CS                                      | 1129 (3.5%)               | 34 (2.3%)                 | 0.80       | (0.57, 1.13) | 0.20    | 0.79     | (0.56, 1.12) | 0.18    |
| <b>Age at 1st delivery</b>                  |                           |                           |            |              |         |          |              |         |
| Under 20 years                              | 5510 (17.0%)              | 221 (14.7%)               | 0.77       | (0.67, 0.89) | <0.001  | 0.76     | (0.66, 0.89) | <0.001  |
| 20-29 years                                 | 22221 (68.4%)             | 1100 (72.9%)              | 1.00       |              |         | 1.00     |              |         |
| 30-49 years                                 | 4770 (14.7%)              | 187 (12.4%)               | 1.20       | (1.02, 1.40) | 0.023   | 1.48     | (1.26, 1.73) | <0.001  |
| <b>Total number of deliveries</b>           |                           |                           |            |              |         |          |              |         |
| Single                                      | 8306 (25.6%)              | 285 (18.9%)               | 1.00       |              |         | 1.00     |              |         |
| 2 to 4                                      | 23323 (71.8%)             | 1171 (77.7%)              | 1.38       | (1.21, 1.57) | <0.001  | 1.25     | (1.09, 1.44) | 0.001   |
| 5+                                          | 872 (2.7%)                | 52 (3.4%)                 | 1.08       | (0.80, 1.45) | 0.61    | 1.04     | (0.77, 1.41) | 0.81    |
| <b>Twins at some point</b>                  |                           |                           |            |              |         |          |              |         |
| No                                          | 32044 (98.6%)             | 1489 (98.7%)              | 1.00       |              |         |          |              |         |
| Yes                                         | 457 (1.4%)                | 19 (1.3%)                 | 0.81       | (0.52, 1.28) | 0.37    |          |              |         |
| <b>Time between deliveries</b>              |                           |                           |            |              |         |          |              |         |
| One delivery                                | 8306 (25.6%)              | 285 (18.9%)               | 1.00       |              |         |          |              |         |
| All < 2 years                               | 3883 (11.9%)              | 196 (13.0%)               | 1.42       | (1.18, 1.70) | <0.001  |          |              |         |
| All greater than or equal to 2 years        | 15463 (47.6%)             | 727 (48.2%)               | 1.35       | (1.18, 1.55) | <0.001  |          |              |         |
| Mixture                                     | 4849 (14.9%)              | 300 (19.9%)               | 1.37       | (1.16, 1.61) | <0.001  |          |              |         |
| <b>Type of perineal wound</b>               |                           |                           |            |              |         |          |              |         |
| No wound                                    | 13601 (41.8%)             | 527 (34.9%)               | 1.00       |              |         | 1.00     |              |         |
| All Episiotomy                              | 8852 (27.2%)              | 412 (27.3%)               | 1.19       | (1.04, 1.35) | 0.009   | 1.03     | (0.90, 1.17) | 0.70    |
| At least one 3rd degree tear                | 150 (0.5%)                | 6 (0.4%)                  | 1.50       | (0.67, 3.34) | 0.33    | 1.23     | (0.55, 2.76) | 0.61    |
| No Perineal Tears (lacerations only)        | 9898 (30.5%)              | 563 (37.3%)               | 1.73       | (1.53, 1.94) | <0.001  | 1.50     | (1.32, 1.70) | <0.001  |



Table 4: Cox Regression Results for Risk Factors of Undergoing Surgical Treatment for FI/RP

| Risk Factor                                    | No Operation<br>(N=32501) | RAP or FI<br>Operation<br>(N=1508) | Unadjusted |              |         | Adjusted |              |         |
|------------------------------------------------|---------------------------|------------------------------------|------------|--------------|---------|----------|--------------|---------|
|                                                | N (%)                     | N (%)                              | HR         | 95% CI       | p-value | HR       | 95% CI       | p-value |
| <b>Mode of delivery</b>                        |                           |                                    |            |              |         |          |              |         |
| SVD/Breech only                                | 19776 (60.8%)             | 56 (57.1%)                         | 1.00       |              |         | 1.00     |              |         |
| CS only                                        | 2524 (7.8%)               | 2 (2.0%)                           | 0.45       | (0.11, 1.84) | 0.26    | 0.41     | (0.10, 1.71) | 0.22    |
| Instrumental (at least one<br>forceps)         | 8433 (25.9%)              | 37 (37.8%)                         | 1.90       | (1.25, 2.88) | 0.003   | 1.81     | (1.18, 2.77) | 0.007   |
| Instrumental (at least one,<br>but no forceps) | 639 (2.0%)                | 1 (1.0%)                           | 1.39       | (0.19, 10.1) | 0.75    | 1.35     | (0.18, 9.87) | 0.77    |
| SVD+CS                                         | 1129 (3.5%)               | 2 (2.0%)                           | 0.83       | (0.20, 3.40) | 0.79    | 0.83     | (0.20, 3.39) | 0.79    |
| <b>Age at 1st delivery</b>                     |                           |                                    |            |              |         |          |              |         |
| Under 20 years                                 | 5510 (17.0%)              | 14 (14.3%)                         | 0.77       | (0.43, 1.36) | 0.36    |          |              |         |
| 20-29 years                                    | 22221 (68.4%)             | 73 (74.5%)                         | 1.00       |              |         |          |              |         |
| 30-49 years                                    | 4770 (14.7%)              | 11 (11.2%)                         | 0.97       | (0.52, 1.83) | 0.93    |          |              |         |
| <b>Total number of deliveries</b>              |                           |                                    |            |              |         |          |              |         |
| Single                                         | 8306 (25.6%)              | 16 (16.3%)                         | 1.00       |              |         |          |              |         |
| 2 to 4                                         | 23323 (71.8%)             | 77 (78.6%)                         | 1.65       | (0.96, 2.83) | 0.067   |          |              |         |
| 5+                                             | 872 (2.7%)                | 5 (5.1%)                           | 1.86       | (0.68, 5.09) | 0.23    |          |              |         |
| <b>Twins at some point</b>                     |                           |                                    |            |              |         |          |              |         |
| No                                             | 32044 (98.6%)             | 96 (98.0%)                         | 1.00       |              |         |          |              |         |
| Yes                                            | 457 (1.4%)                | 2 (2.0%)                           | 1.32       | (0.33, 5.34) | 0.70    |          |              |         |
| <b>Time between deliveries</b>                 |                           |                                    |            |              |         |          |              |         |
| One delivery                                   | 8306 (25.6%)              | 16 (16.3%)                         | 1.00       |              |         |          |              |         |
| All < 2 years                                  | 3883 (11.9%)              | 8 (8.2%)                           | 1.05       | (0.45, 2.45) | 0.91    |          |              |         |
| All greater than or equal to<br>2 years        | 15463 (47.6%)             | 54 (55.1%)                         | 1.82       | (1.04, 3.19) | 0.035   |          |              |         |
| Mixture                                        | 4849 (14.9%)              | 20 (20.4%)                         | 1.66       | (0.86, 3.21) | 0.13    |          |              |         |
| <b>Type of perineal wound</b>                  |                           |                                    |            |              |         |          |              |         |
| No wound                                       | 13601 (41.8%)             | 43 (43.9%)                         | 1.00       |              |         | 1.00     |              |         |
| All Episiotomy                                 | 8852 (27.2%)              | 26 (26.5%)                         | 0.98       | (0.60, 1.60) | 0.94    | 0.80     | (0.48, 1.33) | 0.40    |
| At least one 3rd degree tear                   | 150 (0.5%)                | 7 (7.1%)                           | 21.8       | (9.72, 48.7) | <0.001  | 16.9     | (7.44, 38.3) | <0.001  |
| No Perineal Tears<br>(lacerations only)        | 9898 (30.5%)              | 22 (22.4%)                         | 0.83       | (0.49, 1.38) | 0.47    | 0.76     | (0.45, 1.29) | 0.31    |



1  
2  
3 **Table 6** shows the unadjusted ORs for the different risk factors for repeat POP operation.  
4  
5  
6 Only women with age at first delivery of 30-39 years were less likely to have a re-operation  
7  
8 for POP. 72 of 814 women underwent repeat anterior repair at some point with a re-operation  
9  
10 rate for the anterior compartment of 8.8%. Similarly, 57/775 women underwent a repeat  
11  
12 posterior repair with a re-operation rate of 7.4% for the posterior compartment. For those  
13  
14 women whose initial POP operation was in the anterior and posterior compartments, the  
15  
16 median (IQR) time interval for repeat surgery was 3 years (1, 9.25) and 4 years (1, 9)  
17  
18 respectively.  
19  
20  
21  
22  
23  
24  
25  
26  
27  
28  
29  
30  
31  
32  
33  
34  
35  
36  
37  
38  
39  
40  
41  
42  
43  
44  
45  
46  
47  
48  
49  
50  
51  
52  
53  
54  
55  
56  
57  
58  
59  
60

Table 5: Results of Logistic Regression for Risk of Re-Operation for UI

| Risk Factor                           | UI operation |            | Unadjusted Analysis |              |         | Adjusted Analysis |              |         |
|---------------------------------------|--------------|------------|---------------------|--------------|---------|-------------------|--------------|---------|
|                                       | One (N=695)  | > 1 (N=67) | OR                  | 95% CI       | p-value | OR                | 95% CI       | p-value |
| <b>Type of first SUI surgery</b>      |              |            |                     |              |         |                   |              |         |
| Abdominal retropubic procedures       | 285 (41.0%)  | 34 (50.7%) | 1.00                |              |         | 1.00              |              |         |
| Mid-urethral slings                   | 331 (47.6%)  | 11 (16.4%) | 0.28                | (0.14, 0.56) | <0.001  | 0.30              | (0.15, 0.60) | 0.001   |
| Anterior Colporrhaphy                 | 66 (9.5%)    | 14 (20.9%) | 1.78                | (0.90, 3.50) | 0.096   | 1.92              | (0.97, 3.82) | 0.063   |
| Peri-urethral Injectables             | 5 (0.7%)     | 5 (7.5%)   | 8.38                | (2.31, 30.4) | 0.001   | 9.05              | (2.42, 33.8) | 0.001   |
| Repair of Uro-genital Fistulae        | 8 (1.2%)     | 3 (4.5%)   | 3.14                | (0.80, 12.4) | 0.102   | 2.50              | (0.58, 10.8) | 0.22    |
| <b>Mode of delivery</b>               |              |            |                     |              |         |                   |              |         |
| SVD only                              | 488 (70.2%)  | 45 (67.2%) | 1.00                |              |         |                   |              |         |
| CS only                               | 16 (2.3%)    | 2 (3.0%)   | 1.36                | (0.30, 6.08) | 0.69    |                   |              |         |
| At least one forceps                  | 158 (22.7%)  | 14 (20.9%) | 0.96                | (0.51, 1.80) | 0.90    |                   |              |         |
| At least one instrumental: no forceps | 9 (1.3%)     | 3 (4.5%)   | 3.62                | (0.95, 13.8) | 0.06    |                   |              |         |
| SVD+CS                                | 24 (3.5%)    | 3 (4.5%)   | 1.36                | (0.39, 4.68) | 0.63    |                   |              |         |
| <b>Age at 1st delivery</b>            |              |            |                     |              |         |                   |              |         |
| Under 20 years                        | 166 (23.9%)  | 16 (23.9%) | 0.93                | (0.51, 1.67) | 0.80    |                   |              |         |
| 20-29 years                           | 470 (67.6%)  | 49 (73.1%) | 1.00                |              |         |                   |              |         |
| 30-49 years                           | 59 (8.5%)    | 2 (3.0%)   | 0.33                | (0.08, 1.37) | 0.13    |                   |              |         |
| <b>Total number of deliveries</b>     |              |            |                     |              |         |                   |              |         |
| One                                   | 116 (16.7%)  | 10 (14.9%) | 1.00                |              |         |                   |              |         |
| 2 to 4                                | 558 (80.3%)  | 56 (83.6%) | 1.16                | (0.58, 2.35) | 0.67    |                   |              |         |
| 5+                                    | 21 (3.0%)    | 1 (1.5%)   | 0.55                | (0.07, 4.55) | 0.58    |                   |              |         |
| <b>Occurrence of twins</b>            |              |            |                     |              |         |                   |              |         |
| No                                    | 687 (98.8%)  | 67 (100%)  |                     |              |         |                   |              |         |
| yes                                   | 8 (1.2%)     | 0 (0%)     |                     |              |         |                   |              |         |
| <b>Time between deliveries</b>        |              |            |                     |              |         |                   |              |         |
| One delivery                          | 116 (16.7%)  | 10 (14.9%) | 1.00                |              |         |                   |              |         |
| All < 2 years                         | 89 (12.8%)   | 8 (11.9%)  | 1.04                | (0.40, 2.75) | 0.93    |                   |              |         |
| All greater than 2 years              | 354 (19.6%)  | 10 (14.9%) | 1.28                | (0.62, 2.64) | 0.51    |                   |              |         |
| Mixture                               | 136 (19.6%)  | 10 (14.9%) | 0.85                | (0.34, 2.12) | 0.73    |                   |              |         |
| <b>Type of perineal wound</b>         |              |            |                     |              |         |                   |              |         |
| No Wound                              | 239 (34.4%)  | 26 (38.8%) | 1.00                |              |         | 1.00              |              |         |
| All Episiotomy                        | 211 (30.4%)  | 28 (41.8%) | 1.22                | (0.69, 2.15) | 0.49    | 1.22              | (0.68, 2.19) | 0.51    |
| At least one 3rd degree tear          | 1 (0.1%)     | 1 (1.5%)   | 9.19                | (0.56, 151)  | 0.12    | 4.83              | (0.25, 92.8) | 0.30    |
| No Perineal tears (lacerations only)  | 244 (35.1%)  | 12 (17.9%) | 0.45                | (0.22, 0.92) | 0.028   | 0.46              | (0.22, 0.95) | 0.037   |

**Table 6: Results of Logistic Regression for Risk of Re-Operation for POP Repair.**

| Risk Factor                           | POP operation |             | Unadjusted |              |         |
|---------------------------------------|---------------|-------------|------------|--------------|---------|
|                                       | One (N=1270)  | > 1 (N=238) | OR         | 95% CI       | p-value |
| <b>Mode of delivery</b>               |               |             |            |              |         |
| SVD only                              | 857 (67.5%)   | 164 (68.9%) | 1.00       |              |         |
| CS only                               | 7 (0.6%)      | 0 (0%)      |            |              |         |
| At least one forceps                  | 365 (28.7%)   | 65 (27.3%)  | 0.93       | (0.68, 1.27) | 0.65    |
| At least one instrumental: no forceps | 15 (1.2%)     | 1 (0.4%)    | 0.35       | (0.05, 2.66) | 0.31    |
| SVD+CS                                | 26 (2.0%)     | 8 (3.4%)    | 1.61       | (0.72, 3.61) | 0.25    |
| <b>Age at 1st delivery</b>            |               |             |            |              |         |
| Under 20 years                        | 174 (13.7%)   | 47 (19.7%)  | 1.44       | (1.00, 2.06) | 0.049   |
| 20-29 years                           | 926 (72.9%)   | 174 (73.1%) | 1.00       |              |         |
| 30-49 years                           | 170 (13.4%)   | 17 (7.1%)   | 0.53       | (0.31, 0.90) | 0.018   |
| <b>Total number of deliveries</b>     |               |             |            |              |         |
| One                                   | 246 (19.4%)   | 39 (16.4%)  | 1.00       |              |         |
| 2 to 4                                | 978 (77.0%)   | 193 (81.1%) | 1.25       | (0.86, 1.81) | 0.25    |
| 5+                                    | 46 (3.6%)     | 6 (2.5%)    | 0.82       | (0.33, 2.06) | 0.68    |
| <b>Occurrence of twins</b>            |               |             |            |              |         |
| No                                    | 1254 (98.7%)  | 235 (98.7%) | 1.00       |              |         |
| yes                                   | 16 (1.3%)     | 3 (1.3%)    | 1.00       | (0.29, 3.46) | 0.99    |
| <b>Time between deliveries</b>        |               |             |            |              |         |
| One delivery                          | 246 (19.4%)   | 39 (16.4%)  | 1.00       |              |         |
| All < 2 years                         | 167 (13.1%)   | 29 (12.2%)  | 1.10       | (0.65, 1.84) | 0.73    |
| All greater than 2 years              | 608 (47.9%)   | 119 (50.0%) | 1.24       | (0.84, 1.83) | 0.29    |
| Mixture                               | 249 (19.6%)   | 51 (21.4%)  | 1.29       | (0.82, 2.03) | 0.27    |
| <b>Type of perineal wound</b>         |               |             |            |              |         |
| No Wound                              | 442 (34.8%)   | 85 (35.7%)  | 1.00       |              |         |
| All Episiotomy                        | 361 (28.4%)   | 51 (21.4%)  | 0.74       | (0.51, 1.07) | 0.11    |
| At least one 3rd degree tear          | 5 (0.4%)      | 1 (0.4%)    | 1.04       | (0.12, 9.01) | 0.97    |
| No perineal tears (lacerations only)  | 462 (36.4%)   | 101 (42.4%) | 1.14       | (0.83, 1.56) | 0.43    |

**Discussion:**

In this large longitudinal epidemiological study we have established the lifetime risk for parous women, in a UK population, to undergo a single pelvic floor surgery (UI/POP/RP-FI) as 12.2% by age of 80 years. Olsen et al (9) reported an 11.1% lifetime risk for women to undergo a single operation for UI/POP by age of 80 years. Their results were echoed by Fialkow et al (15) in 2008; showing a similar 11.8% lifetime risk for UI/POP surgery in a

1  
2  
3 similar cohort of American women. The latter two studies were limited because they sampled  
4 health maintenance organisations. Therefore the results may not be applied to European or  
5 wider USA populations, since generalisability would have been poor through the exclusion of  
6 large groups, such as the elderly, socially disabled, lower social class and individuals with  
7 chronic illness. Furthermore, both study designs were cross-sectional and therefore suffered  
8 from a limited follow-up period. Our study is a longitudinal retrospective study spanning the  
9 lifetime of a group of women representing the “general-population” in UK. We chose 80-  
10 years as our age limit as it represents the average life-span of women in UK (14). The  
11 population in Aberdeen city and district is predominantly caucasian however with a number of  
12 ethnic minority communities including Asian, African and Eastern Europe and therefore is  
13 deemed to be quite representative of the general UK population.  
14  
15  
16  
17  
18  
19  
20  
21  
22  
23  
24  
25  
26  
27  
28  
29  
30  
31

32 Unlike previous studies, we calculated the lifetime risk for surgical treatment of various  
33 pelvic floor disorders separately; the life-time risk of women to undergo a single UI operation  
34 in our study was 3.6%. The MRC Leicestershire study (2) showed that 33.6% of the  
35 population in the UK above age of 40 years describe UI symptoms, however only 6.2%  
36 reported these symptoms to be bothersome. A recent French study showed similar findings  
37 with 29% prevalence of female UI, although only 9% sought medical help (16). Conservative  
38 measures such as pelvic floor muscle training (PFMT) can be quite successful in management of  
39 50-60% of women with UI (17), while surgical treatment is usually a second line  
40 management. Therefore the lifetime risk reported in our study is likely to be a true reflection  
41 of the current clinical practice.  
42  
43  
44  
45  
46  
47  
48  
49  
50  
51  
52  
53  
54  
55  
56  
57

58 Our study showed that the lifetime risk of women undergoing a single POP surgery was  
59 9.5%; this was almost 50% lower than the risk of women in Western Australia. In 2010,  
60

1  
2  
3 Smith et al (10) conducted a cross-sectional study on female “general population” in Western  
4 Australia between 2001 and 2005 and they calculated a higher lifetime risk for POP surgery  
5 of 19% by age of 85 years. It is difficult to explain the difference in the results between both  
6 population-based studies. The difference in design, i.e. longitudinal vs. cross-sectional, is  
7 unlikely to be a major influence. In a European study, Hove et al (18) assessed the whole  
8 population of a small town in Netherlands and reported that 40% of women aged 45-85 years,  
9 to have POP  $\geq$  stage II on examination, however only 12% of women were symptomatic. We  
10 therefore believe that, with the current concept of only treating symptomatic and/or severe  
11 prolapse and knowing that a percentage of women will opt for conservative measures such as  
12 vaginal pessaries, the life-time surgical risk reported in our study is likely to be more  
13 representative for the clinical practice in UK and European countries.  
14  
15  
16  
17  
18  
19  
20  
21  
22  
23  
24  
25  
26  
27  
28  
29  
30  
31

32 The re-operation rate for UI/POP in our study was 19% and was comparable with 17%  
33 reported by Denman et al (13) in a 10 year follow-up prospective study. The re-operation rate  
34 in the latter study increased to 21% after adjustment for missing women in the follow-up.  
35 Olsen et al (9) reported 29% re-operation rates for UI/ POP within 5 years time in their cross-  
36 sectional study. It is important to note that 50% of their population were smokers  
37 (current/former) and over 20% suffered from chronic lung disease which may have  
38 contributed to their higher re-operation rates. The re-operation rates, in our study, for UI and  
39 POP separately were 8.8% and 15.8% respectively; these were comparable to 8% and 13%  
40 re-operation rates for UI and POP respectively reported by Clarke et al (19) in their 5-year  
41 prospective study. Similarly, Fialkow et al (15) showed an 8.6% re-operation rates for UI  
42 over 8 years in a retrospective cohort study. The POP re-operation rates in the same  
43 compartment were not hugely different between the anterior and posterior compartments.  
44 Similar results were reported by Clarke et al (19) who found a five-year re-operation rates for  
45  
46  
47  
48  
49  
50  
51  
52  
53  
54  
55  
56  
57  
58  
59  
60

1  
2  
3 anterior of 8% and posterior compartments of 11%, with higher re-operation rates (15% vs.  
4  
5 12% respectively) if associated with apical prolapse.  
6  
7  
8  
9

10 In our study, exclusive delivery by caesarean sections, compared to women who had only  
11 SVDs, was found to be protective against pelvic floor surgery for each of UI, POP, and RP-FI  
12 ( $\approx 60\%$ ). This protective effect was not seen if a woman had a mixture of caesarian and  
13 vaginal deliveries. A single forceps delivery significantly increased the risk of surgery for  
14 POP and/or RP-FI but not for UI. Similar results were reported by MacArthur et al (20) in  
15 their 12 years prospective study and Larson et al (21) in their nested case-control study. In our  
16 study, the increased parity of 2-4 deliveries was an independent risk factor for POP/UI  
17 surgery compared to a single delivery. A Dutch group previously showed increased parity of  
18 2-3 to be a risk factor for the development of POP; interestingly the risk was not further  
19 increased if parity was  $> 3$  (5). Conversely, MacArthur et al (20) found parity  $\geq 4$  to be a risk  
20 factor for UI. The latter two studies assessed risk factors for development of symptomatic  
21 UI/POP rather than risk factors for undergoing surgical treatment. It is evident from our data  
22 that increased parity and vaginal forceps deliveries are risk factors for the development of  
23 UI/POP that warrant surgical management. As expected, sustaining a third degree perineal  
24 tear was a risk factor for undergoing RP-FI surgery. Episiotomy was not found to be  
25 protective.  
26  
27  
28  
29  
30  
31  
32  
33  
34  
35  
36  
37  
38  
39  
40  
41  
42  
43  
44  
45  
46  
47  
48  
49

50 Analysis of potential risk factors for re-operation for UI/POP did not reveal specific  
51 independent risk factors, except for delayed age at first delivery (30-39 years) which seems to  
52 be of little clinical significance. These results were in agreement with other studies in the  
53 literature (9, 13, 15); all of which failed to detect independent risk factors for repeat UI/POP  
54 surgery. However it was evident that women undergoing MUS had significantly reduced risk  
55  
56  
57  
58  
59  
60

1  
2  
3 of re-operation for UI when compared to abdominal retropubic surgery. It can be argued that  
4  
5 MUS have not been used in surgical practice for as long as abdominal retropubic procedures  
6  
7 and therefore the detected reduced risk may be subject to bias. However, the finding of the  
8  
9 median **time interval for repeat UI surgery as 1 year following MUS compared to 4 years**  
10  
11 **following retropubic abdominal procedures** is reassuring that repeat surgery following MUS  
12  
13 is likely to have been captured within the time frame of this study. Conversely, peri-urethral  
14  
15 injections were associated with significantly higher risk of repeat UI surgery. Fialkow et al  
16  
17 (15), have previously reported a reduced risk of repeat UI surgery following Burch  
18  
19 colposuspension compared to traditional slings.  
20  
21  
22  
23  
24  
25  
26

### 27 **Strengths and limitations:**

- 28  
29 - To our knowledge, this is the first study to report the lifetime risk for women in UK to  
30  
31 undergo surgical treatment for UI/ POP/ RP-FI.  
32  
33
- 34 - Large cohort size and long duration of follow-up  
35  
36
- 37 - The study represents the general population rather than a selected population,  
38  
39 therefore we are confident that our findings are generalisable to the UK or indeed any  
40  
41 European population.  
42  
43
- 44 - Aberdeen city and district had a relatively stable population over the last century,  
45  
46 minimising loss to follow up.  
47  
48
- 49 - Both AMND and SMR databases used in this study are subjected to quality control  
50  
51 measures at regular intervals and there are numerous consistency checks in place to  
52  
53 ensure validity of data entry.  
54  
55
- 56 - Good quality data relating to both exposure (AMND) and outcomes (SMR) added  
57  
58 strength and validity to the findings.  
59  
60

1  
2  
3  
4  
5  
6  
7  
8  
9  
10  
11  
12  
13  
14  
15  
16  
17  
18  
19  
20  
21  
22  
23  
24  
25  
26  
27  
28  
29  
30  
31  
32  
33  
34  
35  
36  
37  
38  
39  
40  
41  
42  
43  
44  
45  
46  
47  
48  
49  
50  
51  
52  
53  
54  
55  
56  
57  
58  
59  
60

Our study however had a number of limitations:

- Information was missing on smoking and BMI in a large proportion of women.
- We were unable to link 27% of women with the SMR databases. There are a number of possible reasons for this:
  - (a) Failure to match the health records for these women with the data available on the AMND
  - (b) These women are alive and have moved away from Scotland
  - (c) They may have undergone further treatment on private basis.

In the latter two situations their hospital admissions would not be recorded by the ISD in Scotland. As migration is highly correlated with socio-economic status, we cannot rule out any selection bias resulting from this.

- There is also a possibility, albeit small, of misclassification bias resulting from wrong linkage due to error in probability matching.

### **Clinical and research Implications:**

We believe our results are essential to inform policy makers in the UK and Europe with regards healthcare planning, resource allocation and staff training. Increased BMI and forceps deliveries were independent risk factors for undergoing surgery for pelvic floor disorders; both of which are potentially avoidable. Exclusive delivery by Caesarean sections was found to be protective against pelvic floor surgery, although not 100% protective. Other risks associated with delivery by caesarean sections should be taken into consideration when making decisions regarding the mode of delivery.



## Conclusion

Our study reveals that more than one in ten parous women in UK, over their lifetime, will require at least one surgical procedure for pelvic floor dysfunction with 19% requiring more than one procedure. Independent risk factors for pelvic floor surgery were forceps delivery and delayed initial child bearing. Protective factors included early initial delivery and delivery exclusively by caesarean section. This information is essential for clinicians, patients and policy makers with regards to counselling, decision making and allocation of health care resources.

**Competing Interests:** The authors declare that they have no conflict of interest.

**Data Sharing:** Data tables and summaries are available from corresponding author at [m.abdelfattah@abdn.ac.uk](mailto:m.abdelfattah@abdn.ac.uk). Consent was not obtained from participants but the presented data are anonymised and risk of identification is low.

**References:**

- (1) National Institute for Health and Clinical Excellence (NICE) and National Collaborating Centre for Women's and Children's Health. Urinary Incontinence; the management of urinary incontinence in women, Royal College of Obstetricians and Gynaecologists Press, London, 2006.
- (2) Perry S, Shaw C, Assassa P, et al. An epidemiological study to establish the prevalence of urinary symptoms and felt need in the community: the Leicestershire MRC Incontinence Study. Leicestershire MRC Incontinence Study Team. *Journal of Public Health Medicine*. 2000; 22(3):427-434.
- (3) Turner DA, Shaw C, McGrother CW, et al. MRC Incontinence Team. The cost of clinically significant urinary storage symptoms for community dwelling adults in the UK. *BJU international*. 2004; 93(9):1246-1252.
- (4) Papanicolaou S, Pons ME, Hampei C, et al. Medical resource utilisation and cost of care for women seeking treatment for urinary incontinence in an outpatient setting: Examples from three countries participating in the PURE study. *Maturitas* 2005; 30(2):35-47.
- (5) Hove M, Pool-Goudzwaard A, Eijkemans M, et al. The prevalence of pelvic organ prolapse symptoms and signs and their relation with bladder and bowel disorders in a general female population. *Int Urogynecol J* 2009; 20:1037-1045
- (6) Aparna D, Kohli SN, Rajan SS, et al. The age distribution, rates, and types of surgery for pelvic organ prolapse in USA. *Int Urogynecol J* 2008; 19: 421-428
- (7) Carlson KJ, Nicholas DH, Schiff I. Indications for hysterectomy. *N Engl J Med* 1993; 328:856-860

- 1  
2  
3 (8) Jacklin C, Duckett J. Analytic model comparing the cost utility of TVT versus  
4 duloxetine in women with urinary stress incontinence. *Int Urogynecol J*. 2010;  
5 21:977–984.  
6  
7  
8  
9  
10 (9) Olsen AL, Smith VJ, Bergstrom JO, et al. Epidemiology of surgically managed pelvic  
11 organ prolapse and urinary incontinence. *Obstet Gynecol* 1997; **89**: 501–6.  
12  
13  
14  
15  
16 (10) Smith F, Holman CD, Moorin RE, et al. Lifetime risk of undergoing surgery for  
17 pelvic organ prolapse. *Obstet Gynaec* 2010; 116 (5):1096-1100  
18  
19  
20  
21 (11) Wiskind AK, Creighton SM, Stanton SL. The incidence of genital prolapse after the  
22 Burch colposuspension. *Am J Obstet Gynecol* 1992; 167: 399-405.  
23  
24  
25  
26 (12) Kjolhede P, Noren B, Ryden G. Prediction of genital prolapse after Burch  
27 colposuspension. *Acta Obstet Gynecol Scand* 1996; 75: 849-54.  
28  
29  
30  
31 (13) Denman MA, Gregory WT, Boyles SH, et al. Reoperation 10 years after surgically  
32 managed pelvic organ prolapse and urinary incontinence. *Am J Obstet Gynecol* 2008;  
33 198: 555.e1-555.e5.  
34  
35  
36  
37 (14) Office of National Statistics 2009; [www.statistics.gov.uk](http://www.statistics.gov.uk)  
38  
39  
40 (15) Fialkow MF, Newton KM, Lentz GM, et al. Lifetime risk of surgical management  
41 for pelvic organ prolapse or urinary incontinence. *Int Urogynecol J* 2008; 19: 437-440  
42  
43  
44 (16) Lasserre A, Pelat C, Gue´roult V, et al. Urinary Incontinence in French Women:  
45 Prevalence, Risk Factors and Impact on Quality of Life. *Eur Urol* 2009; 56: 177 –  
46 183  
47  
48  
49  
50  
51 (17) Imamura M, Abrams P, Bain C, et al. Systematic review and economic modelling of  
52 the effectiveness and cost effectiveness of non-surgical treatments for women with  
53 stress urinary incontinence. *Health Technology Assessment* 2010; Vol. 14: No. 40  
54  
55  
56  
57 (18) Hove M, Bloembergen H, Vierhout M, et al. Distribution of pelvic organ prolapse  
58 (POP) in the general population. *International Congress Series* 2005; 1279: 383– 386  
59  
60

- 1  
2  
3  
4 (19) Clark AL, Gregory T, Smith VJ, et al. Epidemiologic evaluation of reoperation for  
5 surgically treated pelvic organ prolapse and urinary incontinence. *Am J Obstet*  
6 *Gynecol* 2003; 189:1261- 1267  
7  
8  
9  
10 (20) MacArthur C, Glazener C, Lancashire R, et al on behalf of the ProLong study group.  
11 Exclusive caesarean section delivery and subsequent urinary and faecal incontinence:  
12 a 12-year longitudinal study. *BJOG* 2011; DOI: 10.1111/j.1471-0528.2011.02964  
13  
14  
15 (21) Larsson C, Källen K, Andolf E. Cesarean section and risk of pelvic organ prolapse: a  
16 nested case-control study. *Am J Obstet Gynecol* 2009; 200: 243.e1-243.e  
17  
18  
19  
20  
21  
22  
23  
24  
25  
26  
27  
28  
29  
30  
31  
32  
33  
34  
35  
36  
37  
38  
39  
40  
41  
42  
43  
44  
45  
46  
47  
48  
49  
50  
51  
52  
53  
54  
55  
56  
57  
58  
59  
60

STROBE 2007 (v4) Statement—Checklist of items that should be included in reports of *cohort studies*

| Section/Topic                | Item # | Recommendation                                                                                                                                                                       | Reported on page # |
|------------------------------|--------|--------------------------------------------------------------------------------------------------------------------------------------------------------------------------------------|--------------------|
| Title and abstract           | 1      | (a) Indicate the study's design with a commonly used term in the title or the abstract                                                                                               | 55                 |
|                              |        | (b) Provide in the abstract an informative and balanced summary of what was done and what was found                                                                                  | 55                 |
| <b>Introduction</b>          |        |                                                                                                                                                                                      |                    |
| Background/rationale         | 2      | Explain the scientific background and rationale for the investigation being reported                                                                                                 | 56 and 57          |
| Objectives                   | 3      | State specific objectives, including any prespecified hypotheses                                                                                                                     | 57                 |
| <b>Methods</b>               |        |                                                                                                                                                                                      |                    |
| Study design                 | 4      | Present key elements of study design early in the paper                                                                                                                              | 55                 |
| Setting                      | 5      | Describe the setting, locations, and relevant dates, including periods of recruitment, exposure, follow-up, and data collection                                                      | 57 and 58          |
| Participants                 | 6      | (a) Give the eligibility criteria, and the sources and methods of selection of participants. Describe methods of follow-up                                                           | 58                 |
|                              |        | (b) For matched studies, give matching criteria and number of exposed and unexposed                                                                                                  |                    |
| Variables                    | 7      | Clearly define all outcomes, exposures, predictors, potential confounders, and effect modifiers. Give diagnostic criteria, if applicable                                             | 58 and 59          |
| Data sources/<br>measurement | 8*     | For each variable of interest, give sources of data and details of methods of assessment (measurement). Describe comparability of assessment methods if there is more than one group | 58 and 59          |
| Bias                         | 9      | Describe any efforts to address potential sources of bias                                                                                                                            | 73                 |
| Study size                   | 10     | Explain how the study size was arrived at                                                                                                                                            | 58                 |
| Quantitative variables       | 11     | Explain how quantitative variables were handled in the analyses. If applicable, describe which groupings were chosen and why                                                         | 58 and 59          |
| Statistical methods          | 12     | (a) Describe all statistical methods, including those used to control for confounding                                                                                                | 59                 |
|                              |        | (b) Describe any methods used to examine subgroups and interactions                                                                                                                  | 59                 |
|                              |        | (c) Explain how missing data were addressed                                                                                                                                          | 72 and 73          |
|                              |        | (d) If applicable, explain how loss to follow-up was addressed                                                                                                                       | 72 and 73          |
|                              |        | (e) Describe any sensitivity analyses                                                                                                                                                |                    |
| <b>Results</b>               |        |                                                                                                                                                                                      |                    |

|                          |     |                                                                                                                                                                                                              |       |
|--------------------------|-----|--------------------------------------------------------------------------------------------------------------------------------------------------------------------------------------------------------------|-------|
| Participants             | 13* | (a) Report numbers of individuals at each stage of study—eg numbers potentially eligible, examined for eligibility, confirmed eligible, included in the study, completing follow-up, and analysed            | 80    |
|                          |     | (b) Give reasons for non-participation at each stage                                                                                                                                                         | 80    |
|                          |     | (c) Consider use of a flow diagram                                                                                                                                                                           | 80    |
| Descriptive data         | 14* | (a) Give characteristics of study participants (eg demographic, clinical, social) and information on exposures and potential confounders                                                                     |       |
|                          |     | (b) Indicate number of participants with missing data for each variable of interest                                                                                                                          | 80    |
|                          |     | (c) Summarise follow-up time (eg, average and total amount)                                                                                                                                                  | 58    |
| Outcome data             | 15* | Report numbers of outcome events or summary measures over time                                                                                                                                               |       |
| Main results             | 16  | (a) Give unadjusted estimates and, if applicable, confounder-adjusted estimates and their precision (eg, 95% confidence interval). Make clear which confounders were adjusted for and why they were included | 59-66 |
|                          |     | (b) Report category boundaries when continuous variables were categorized                                                                                                                                    | 59-66 |
|                          |     | (c) If relevant, consider translating estimates of relative risk into absolute risk for a meaningful time period                                                                                             |       |
| Other analyses           | 17  | Report other analyses done—eg analyses of subgroups and interactions, and sensitivity analyses                                                                                                               | 59-66 |
| <b>Discussion</b>        |     |                                                                                                                                                                                                              |       |
| Key results              | 18  | Summarise key results with reference to study objectives                                                                                                                                                     | 74    |
| <b>Limitations</b>       |     |                                                                                                                                                                                                              |       |
| Interpretation           | 20  | Give a cautious overall interpretation of results considering objectives, limitations, multiplicity of analyses, results from similar studies, and other relevant evidence                                   | 72-74 |
| Generalisability         | 21  | Discuss the generalisability (external validity) of the study results                                                                                                                                        | 72    |
| <b>Other information</b> |     |                                                                                                                                                                                                              |       |
| Funding                  | 22  | Give the source of funding and the role of the funders for the present study and, if applicable, for the original study on which the present article is based                                                | 54    |

\*Give information separately for cases and controls in case-control studies and, if applicable, for exposed and unexposed groups in cohort and cross-sectional studies.

**Note:** An Explanation and Elaboration article discusses each checklist item and gives methodological background and published examples of transparent reporting. The STROBE checklist is best used in conjunction with this article (freely available on the Web sites of PLoS Medicine at <http://www.plosmedicine.org/>, Annals of Internal Medicine at <http://www.annals.org/>, and Epidemiology at <http://www.epidem.com/>). Information on the STROBE Initiative is available at [www.strobe-statement.org](http://www.strobe-statement.org).

1  
2  
3  
4  
5  
6  
7  
8  
9  
10  
11  
12  
13  
14  
15  
16  
17  
18  
19  
20  
21  
22  
23  
24  
25  
26  
27  
28  
29  
30  
31  
32  
33  
34  
35  
36  
37  
38  
39  
40  
41  
42  
43  
44  
45  
46  
47  
48  
49  
50  
51  
52  
53  
54  
55  
56  
57  
58  
59  
60

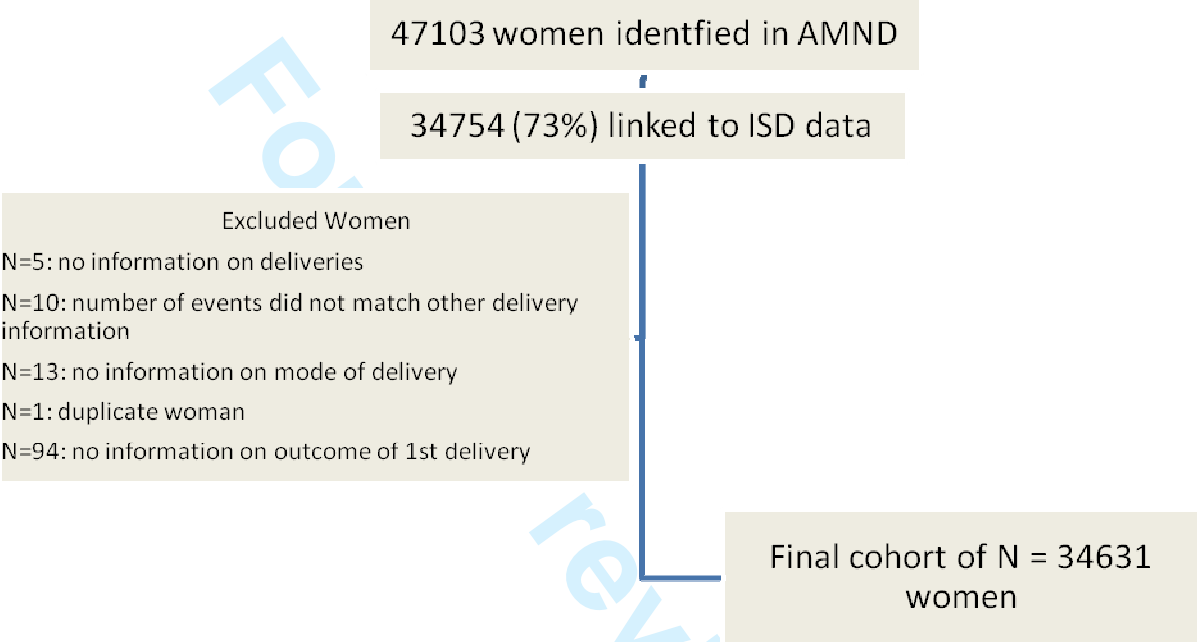

1  
2  
3  
4  
5  
6  
7  
8  
9  
10  
11  
12  
13  
14  
15  
16  
17  
18  
19  
20  
21  
22  
23  
24  
25  
26  
27  
28  
29  
30  
31  
32  
33  
34  
35  
36  
37  
38  
39  
40  
41  
42  
43  
44  
45  
46  
47  
48  
49  
50  
51  
52  
53  
54  
55  
56  
57  
58  
59  
60

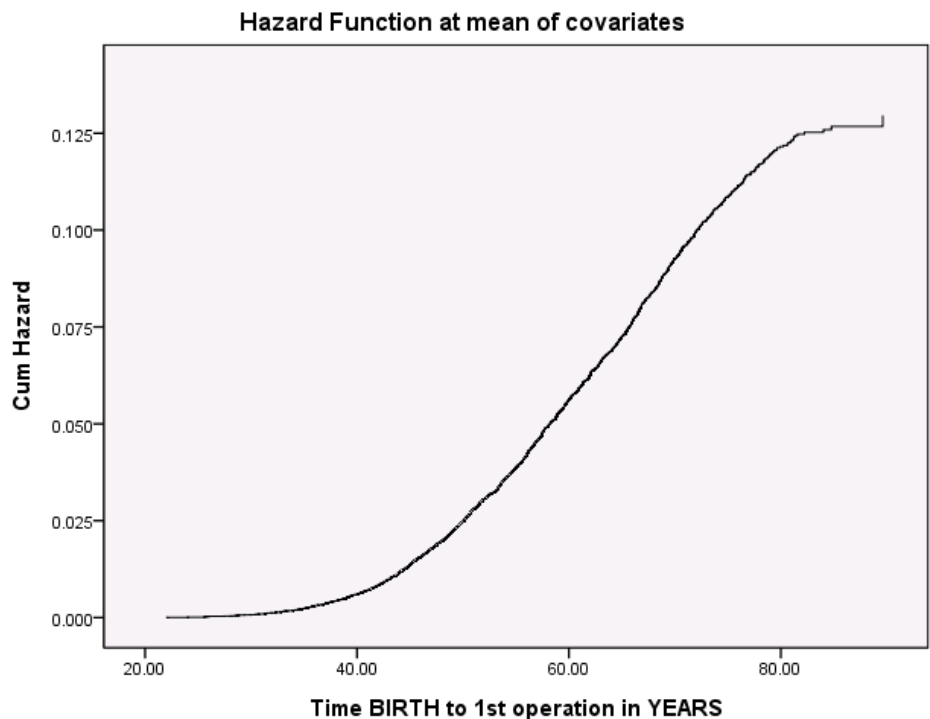

review only
